# Supplementary material
Source: PubMed Central journal article supplement (PMC4558669)
Supplement: supp_tpc.114.135657_tpc135657_SupplementalData.pdf [file supp_tpc.114.135657_tpc135657_SupplementalData.pdf]

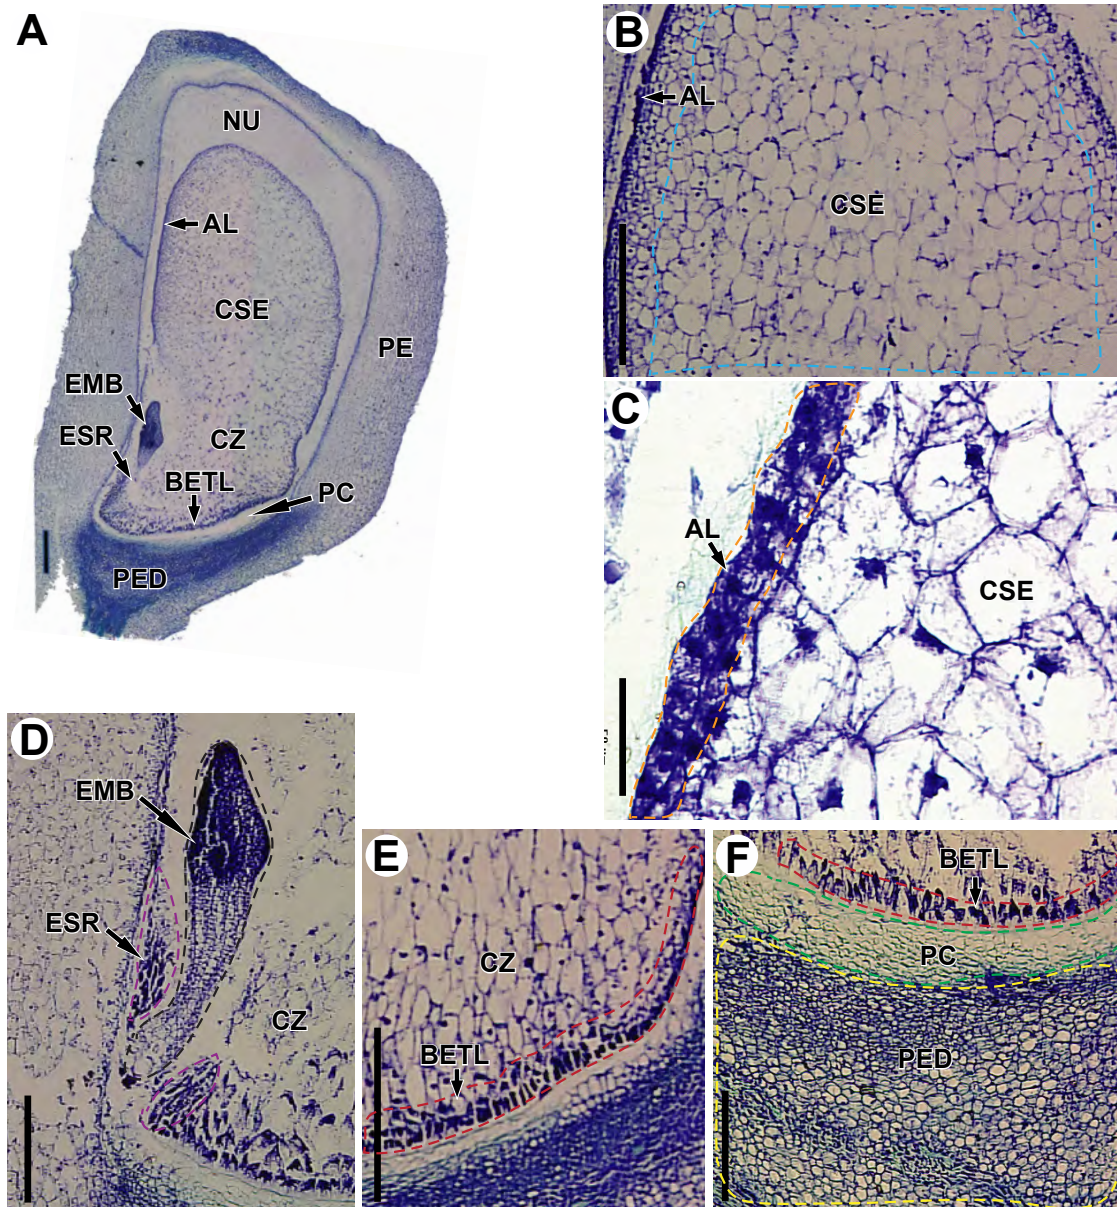

**Supplemental Figure 1.** Structure of an 8-DAP B73 maize kernel.

**(A)** Image of a Toluidine Blue-stained section of 8-DAP kernel showing different compartments. Multiple images of a single kernel section obtained using a low-magnification objective lens were merged using Adobe Photoshop CS5, and background was subsequently removed in Adobe Illustrator CS6 to generate the image. **(B)** through **(F)** Details of the captured kernel compartments. Colored dashed lines indicate the margins of excised compartments in a typical laser-capture experiment. Abbreviations: AL, aleurone; BETL, basal endosperm transfer layer; CSE, central starchy endosperm; CZ, conducting zone; EMB, embryo; ESR, embryo-surrounding region; NU, nucellus; PC: placento-chalazal region; PE, pericarp; PED, vascular region of the pedicel. Bars: (A) and (B), 400  $\mu$ m; (C) and (D), 50  $\mu$ m; (E), 400  $\mu$ m; (F), 200  $\mu$ m.



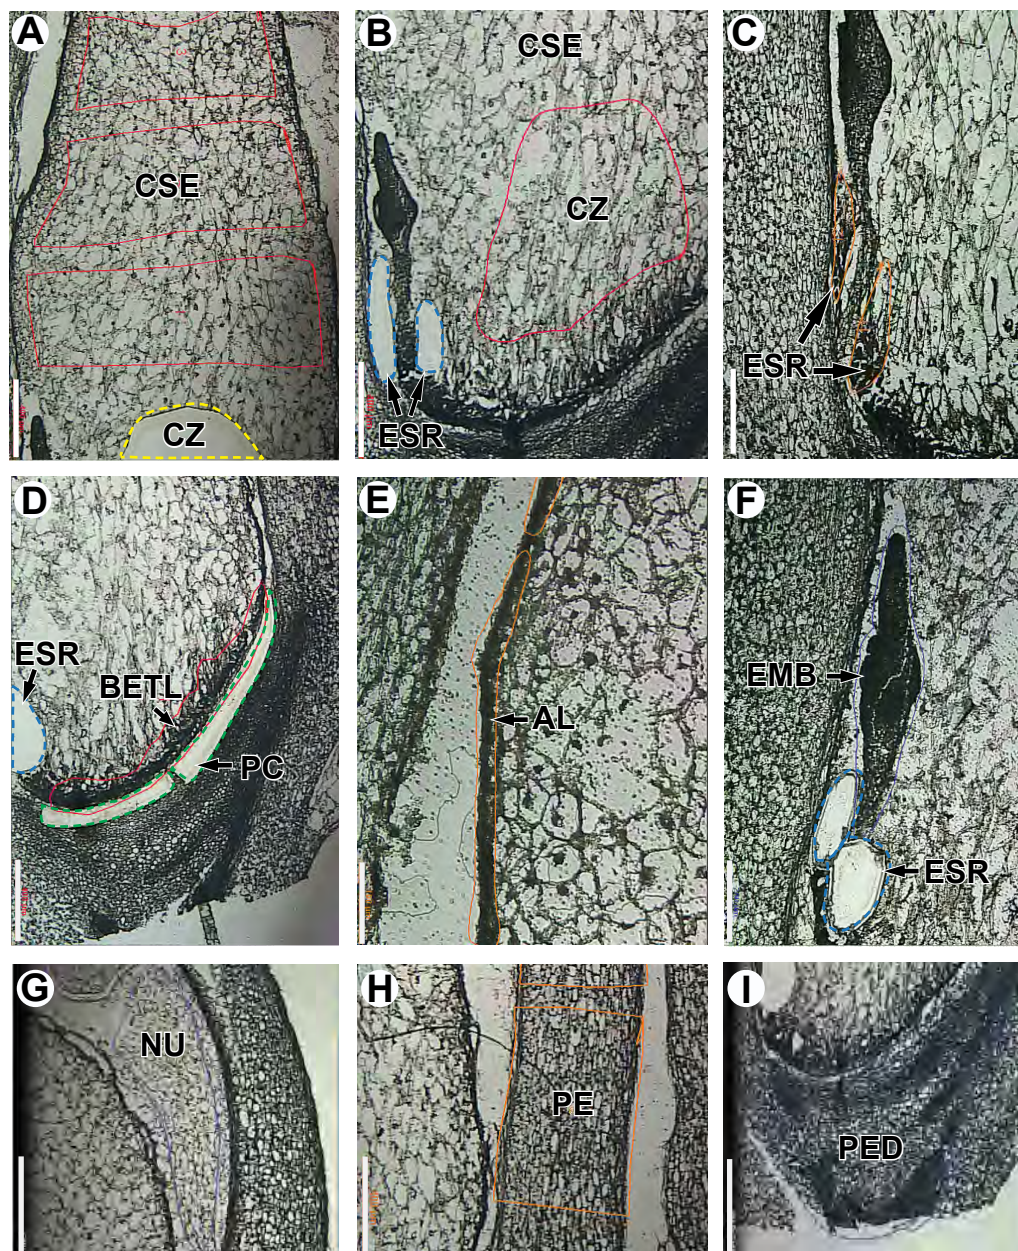

**Supplemental Figure 2.** Representative images of kernel compartments that were marked and collected for the LCM-RNA-Seq analyses reported in this study.

**(A)** Regions of the CSE and the captured regions of CZ; **(B)** CZ and the captured regions of ESR; **(C)** ESR; **(D)** BETL, and the captured regions of ESR and PC; **(E)** Regions of AL; **(F)** The EMB including suspensor and the captured regions of ESR; **(G)** Regions of NU; **(H)** Region of PE; and **(I)** Regions of PED.

Abbreviations same as in Supplemental Figure 1. Bars: (A) and (B), 400  $\mu$ m; (C), 200  $\mu$ m; (D), 400  $\mu$ m; (E), 100  $\mu$ m; (F), 200  $\mu$ m; (G), (H) and (I), 400  $\mu$ m.

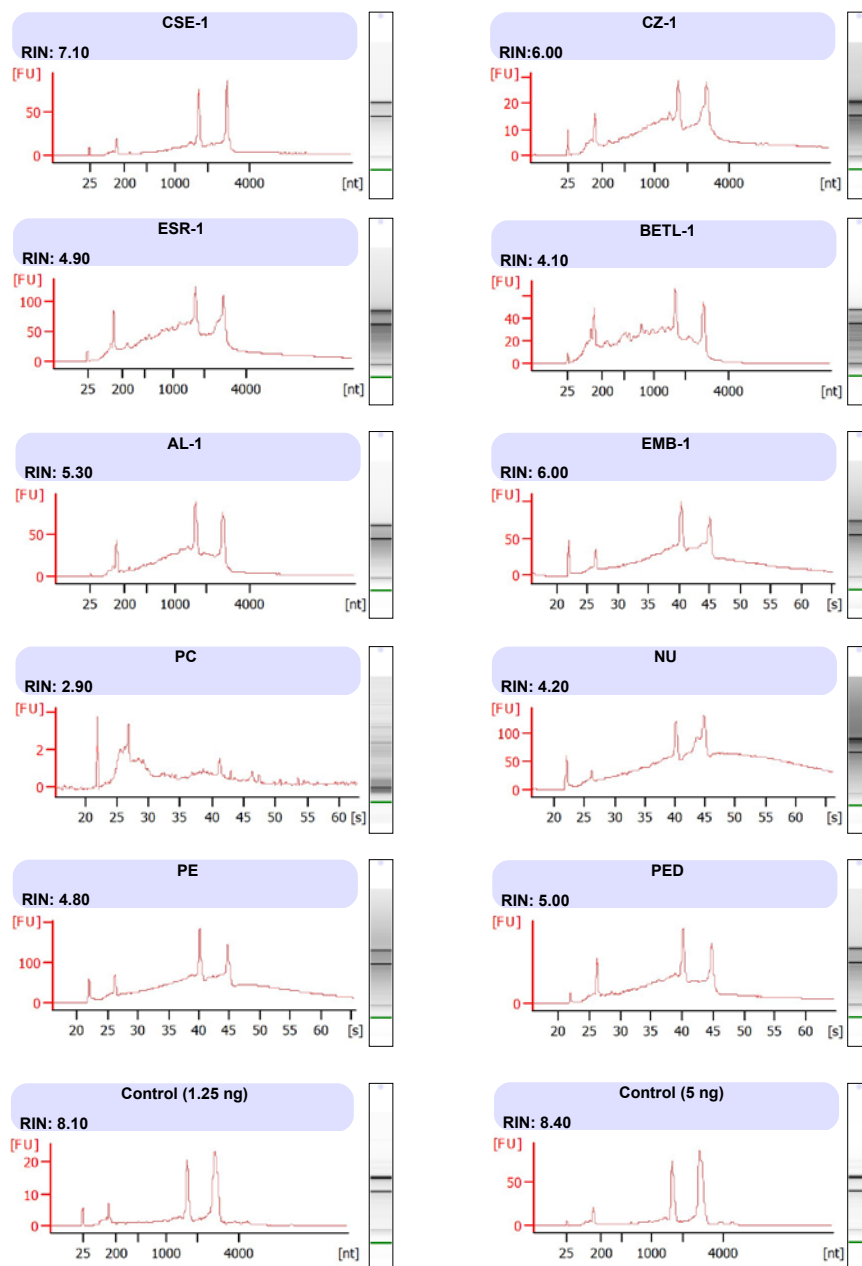

**Supplemental Figure 3.** Representative quality assessments of LCM-derived RNAs used in sequencing. Electropherograms of sample RNAs extracted from the captured kernel compartments prior to DNase treatment. RIN, RNA Integrity Number, is a measure of RNA quality (Agilent Technologies). Controls refer to known concentrations of total RNA obtained from 2-DAP kernels. Abbreviations: AL, aleurone; BETL, basal endosperm transfer layer; CSE, central starchy endosperm; CZ, conducting zone; EMB, embryo; ESR, embryo-surrounding region; NU, nucellus; PC: placento-chalazal region; PE, pericarp; PED, vascular region of the pedicel.

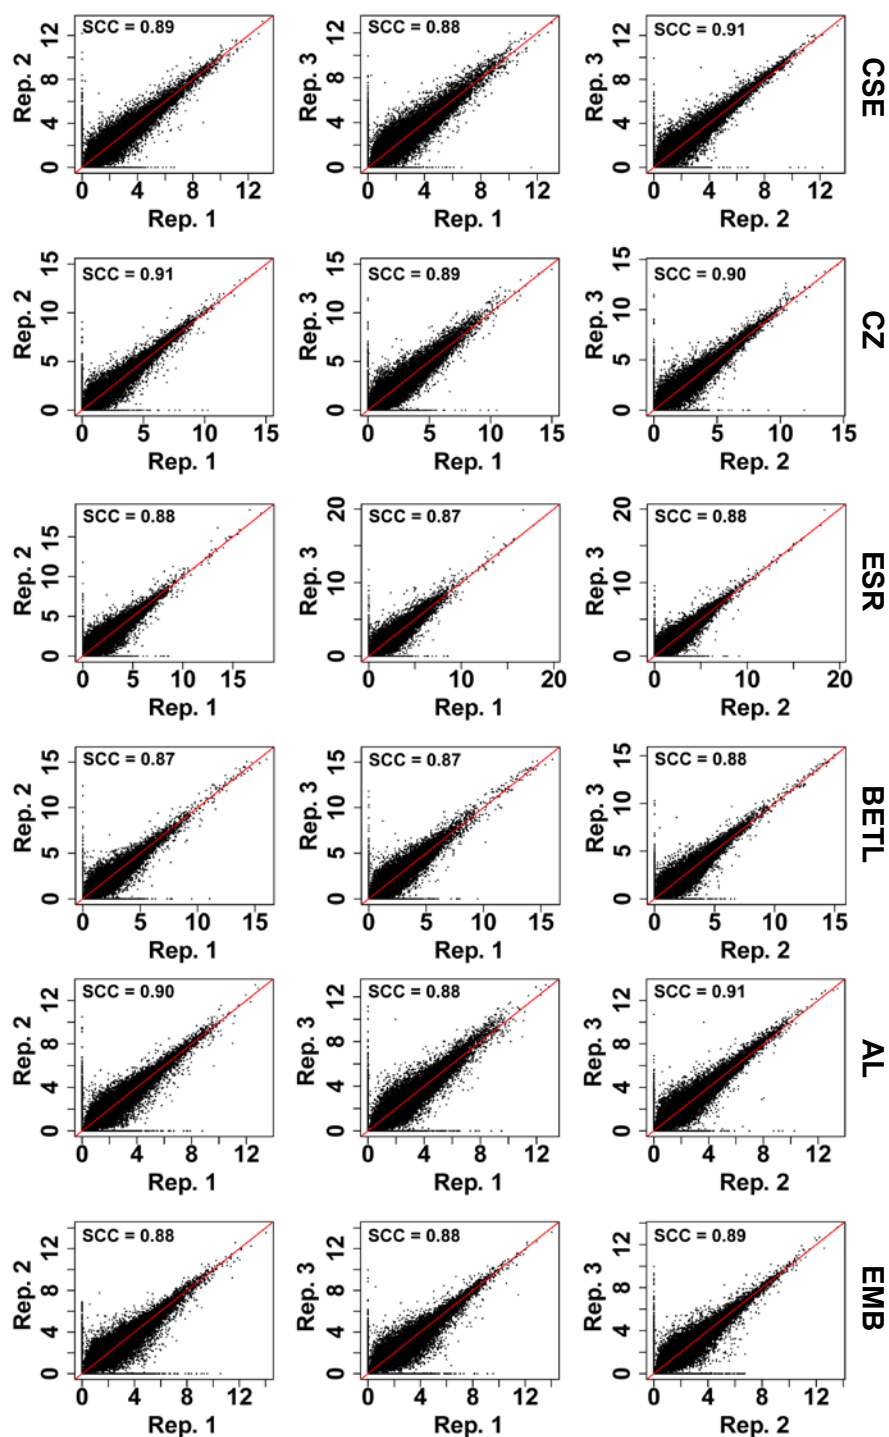

**Supplemental Figure 4.** Reproducibility of RNA-Seq reads for each triplicate of the filial compartments.  $\text{Log}_2$ -transformed FPKM values of the 29,369 genes expressed in at least one of the 22 sequenced samples are shown as scatter plots and were used as input for the Spearman correlation coefficient (SCC) analysis. The red diagonal line in each scatter plot denotes equal FPKMs between two samples. Abbreviations: AL, aleurone; BETL, basal endosperm transfer layer; CSE, central starchy endosperm; CZ, conducting zone; EMB, embryo; ESR, embryo-surrounding region.



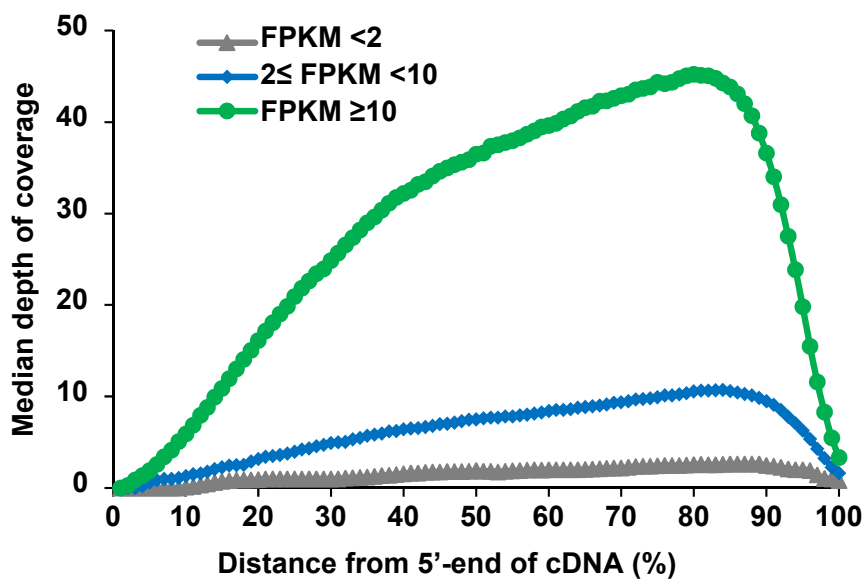

**Supplemental Figure 5.** Distribution profile of RNA-Seq reads along the length of the gene models. Reads of all 22 sequenced samples were pooled and exonic reads were analyzed for depth of coverage using the available reference gene models to show the combination of Oligo(dT) and random primers provided sufficient coverage of the sequenced cDNAs.

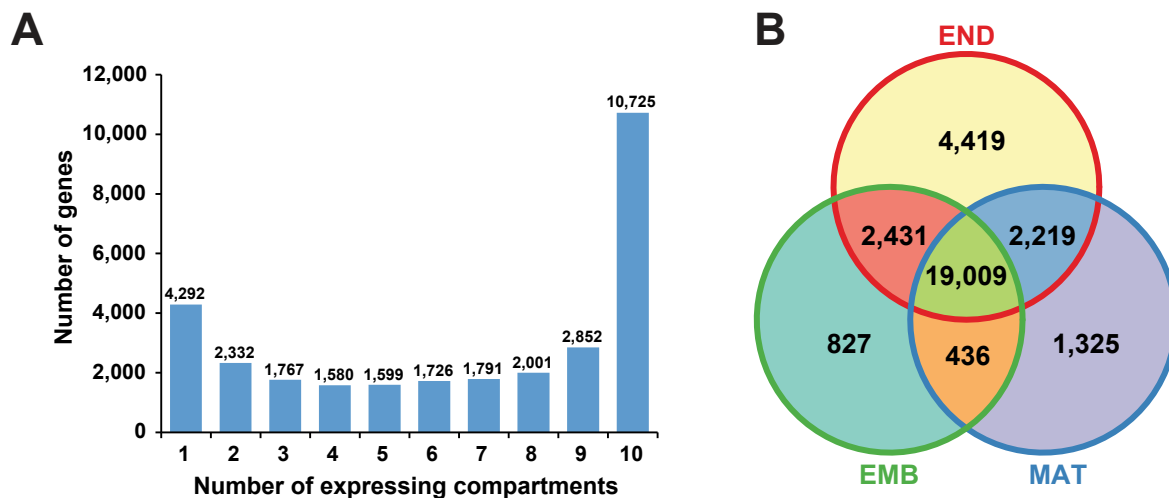

**Supplemental Figure 6.** Profiles of sequenced RNAs from the captured kernel compartments.

**(A)** Number of expressed genes detected in one or more kernel compartments. Among the total 30,665 genes that were expressed in at least one compartment, 10,725 were detected in all compartments while expression of 4,292 genes was restricted to single compartments. **(B)** Venn diagram of the numbers of genes expressed in EMB, expressed in at least one captured compartment of endosperm (END), or expressed in at least one maternal compartment (MAT).

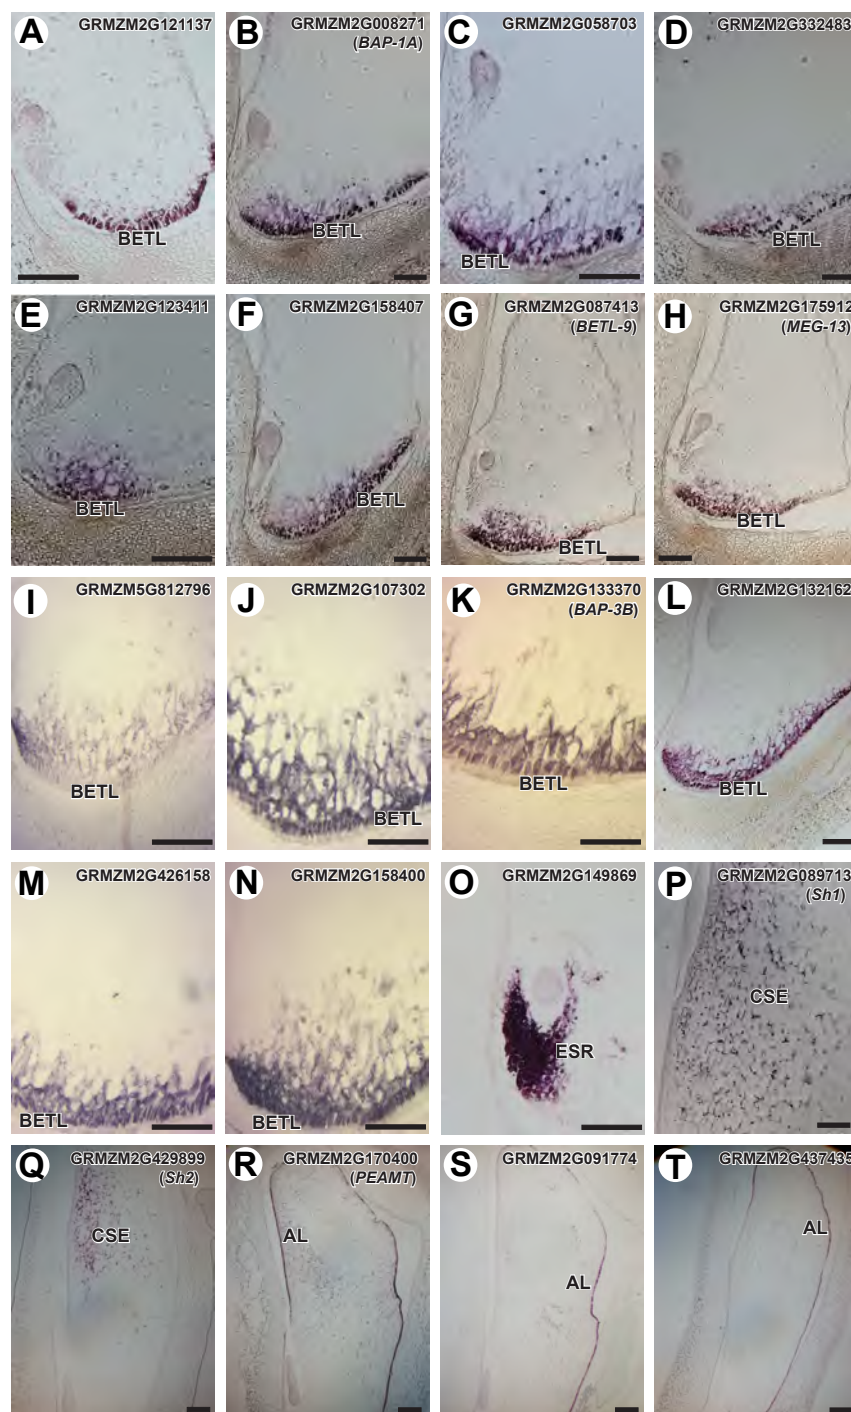

**Supplemental Figure 7.** Validation of the compartment-specific expression patterns using *in situ* hybridization localization of the mRNAs. For each panel, the gene ID/locus name is indicated.

(A) through (N) BETL-specific genes. (O) An ESR-specific gene. (P) and (Q) CSE-specific genes. (R) through (T) AL-specific genes. Stage of kernels: (A), 6 DAP; (B) through (I), 7 DAP; (J) through (N), 8 DAP; (O) 7 DAP; (P) through (T), 10 DAP. Bars: 2 mm.

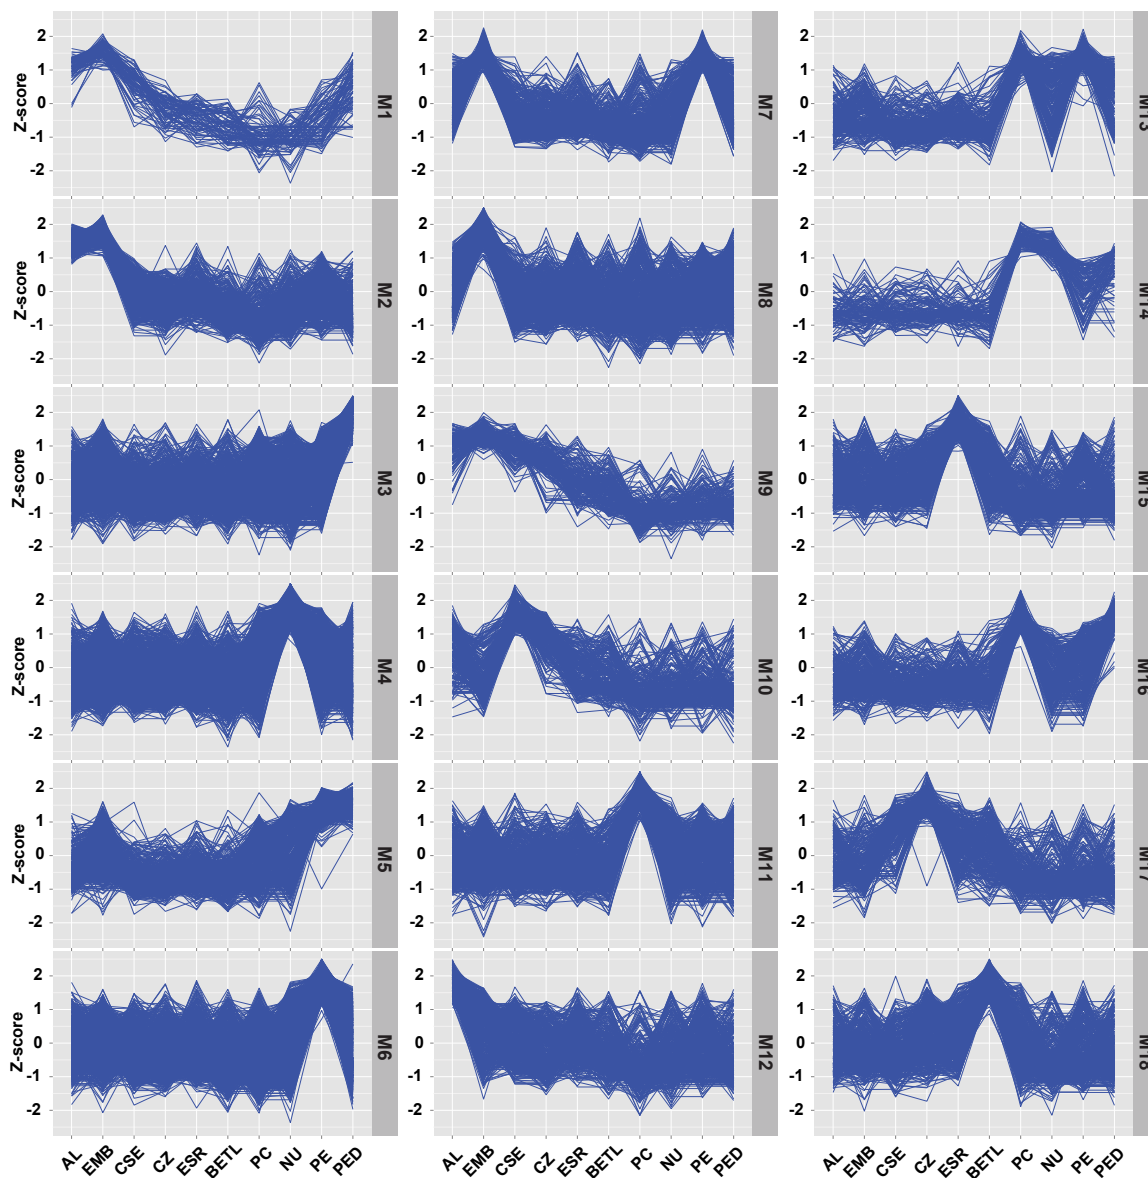

**Supplemental Figure 8.** Z-score plots showing expression profiles of all genes in the WGCNA-generated co-expression modules M1-M18. Abbreviations same as in Supplemental Figure 1.



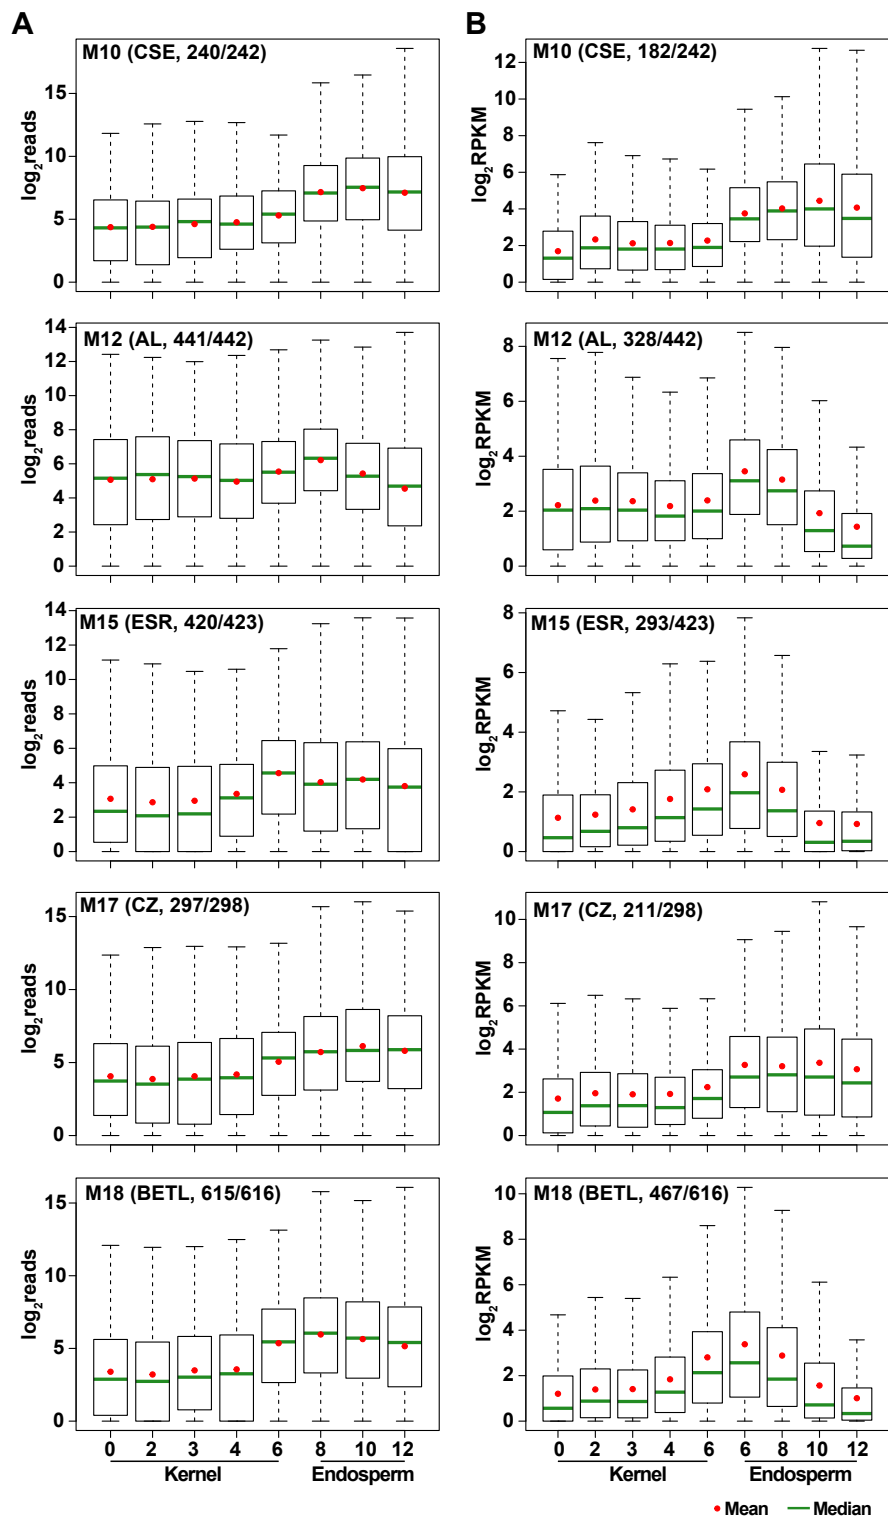

**Supplemental Figure 9.** Expression pattern of genes in the endosperm-associated modules identified by WGCNA based on previously reported RNA-Seq data.

**(A)** Log<sub>2</sub>-transformed normalized read counts data from Li et al. (2014). **(B)** Log<sub>2</sub>-transformed Reads per kilobase of transcript per million mapped reads (RPKM) data from Chen et al. (2014). The selected data included kernels and endosperm of different developmental stages (in days after pollination, DAP). The associated kernel compartment and fractions of genes in each module with available data are indicated in parentheses.

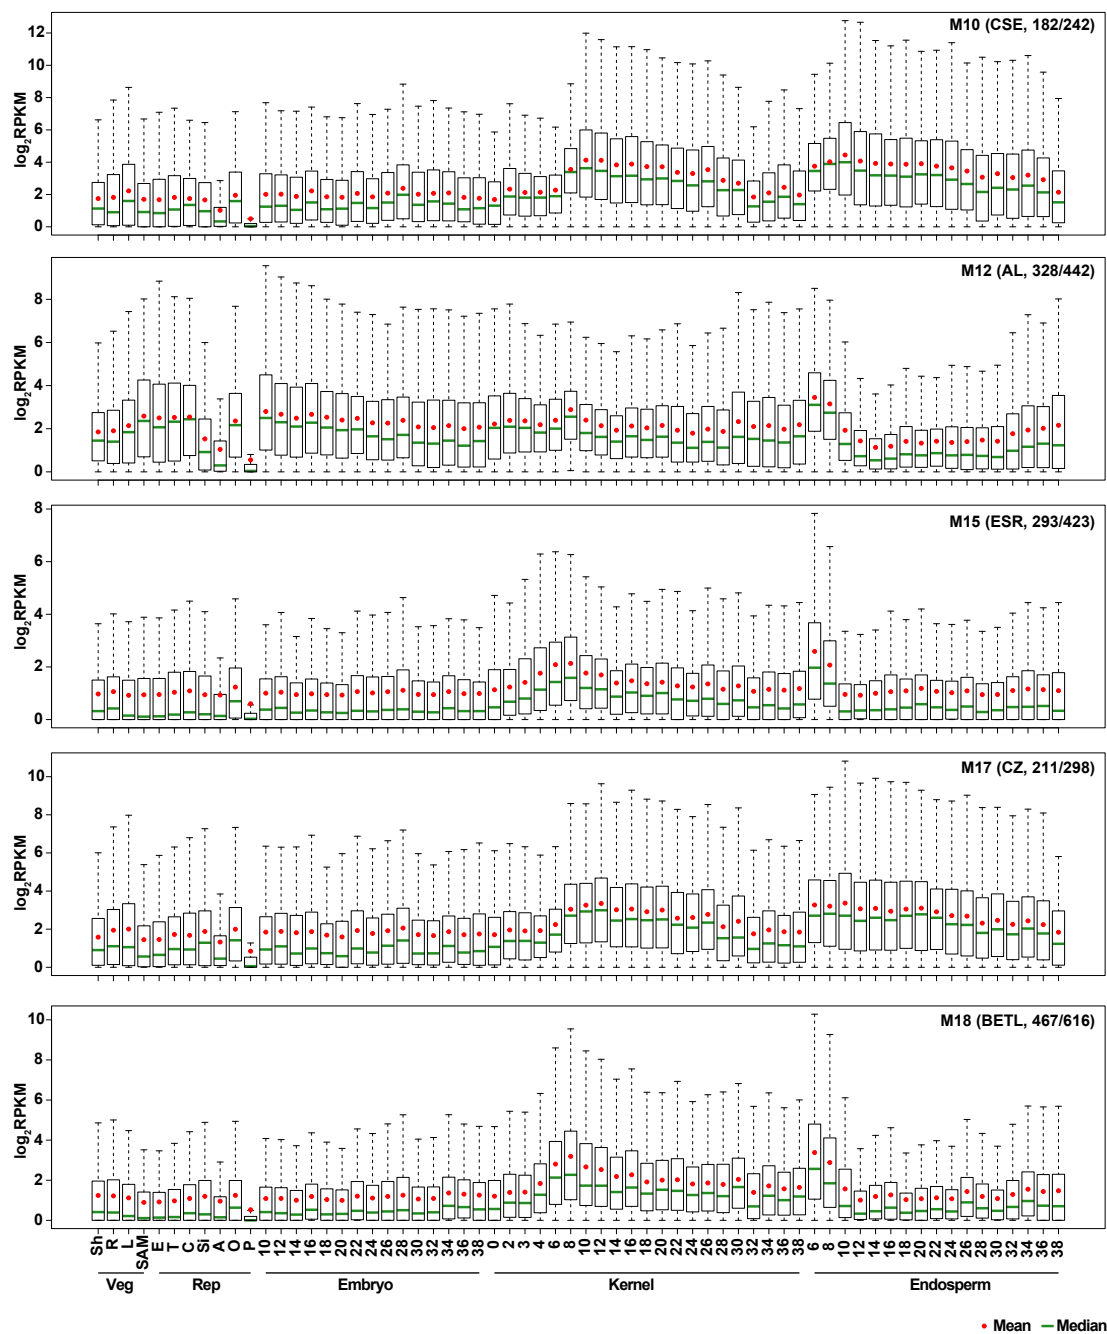

**Supplemental Figure 10.** Expression pattern of genes in the endosperm-associated modules identified by WGCNA based on RNA-Seq data from Chen et al. (2014). The selected data included vegetative (Veg) tissues shoots (Sh), roots (R), Leaf (L), shoot apical meristem (SAM, Replicate 1); reproductive (Rep) tissues ear (E), tassel (T, Replicate 1), pre-emergence cob (C), silk (Si), Anther (A), ovule (O), pollen (P); and whole kernels, endosperm, and embryos of different developmental stages (in days after pollination, DAP). The associated kernel compartment and fractions of genes in each module that have available data are indicated in parentheses.

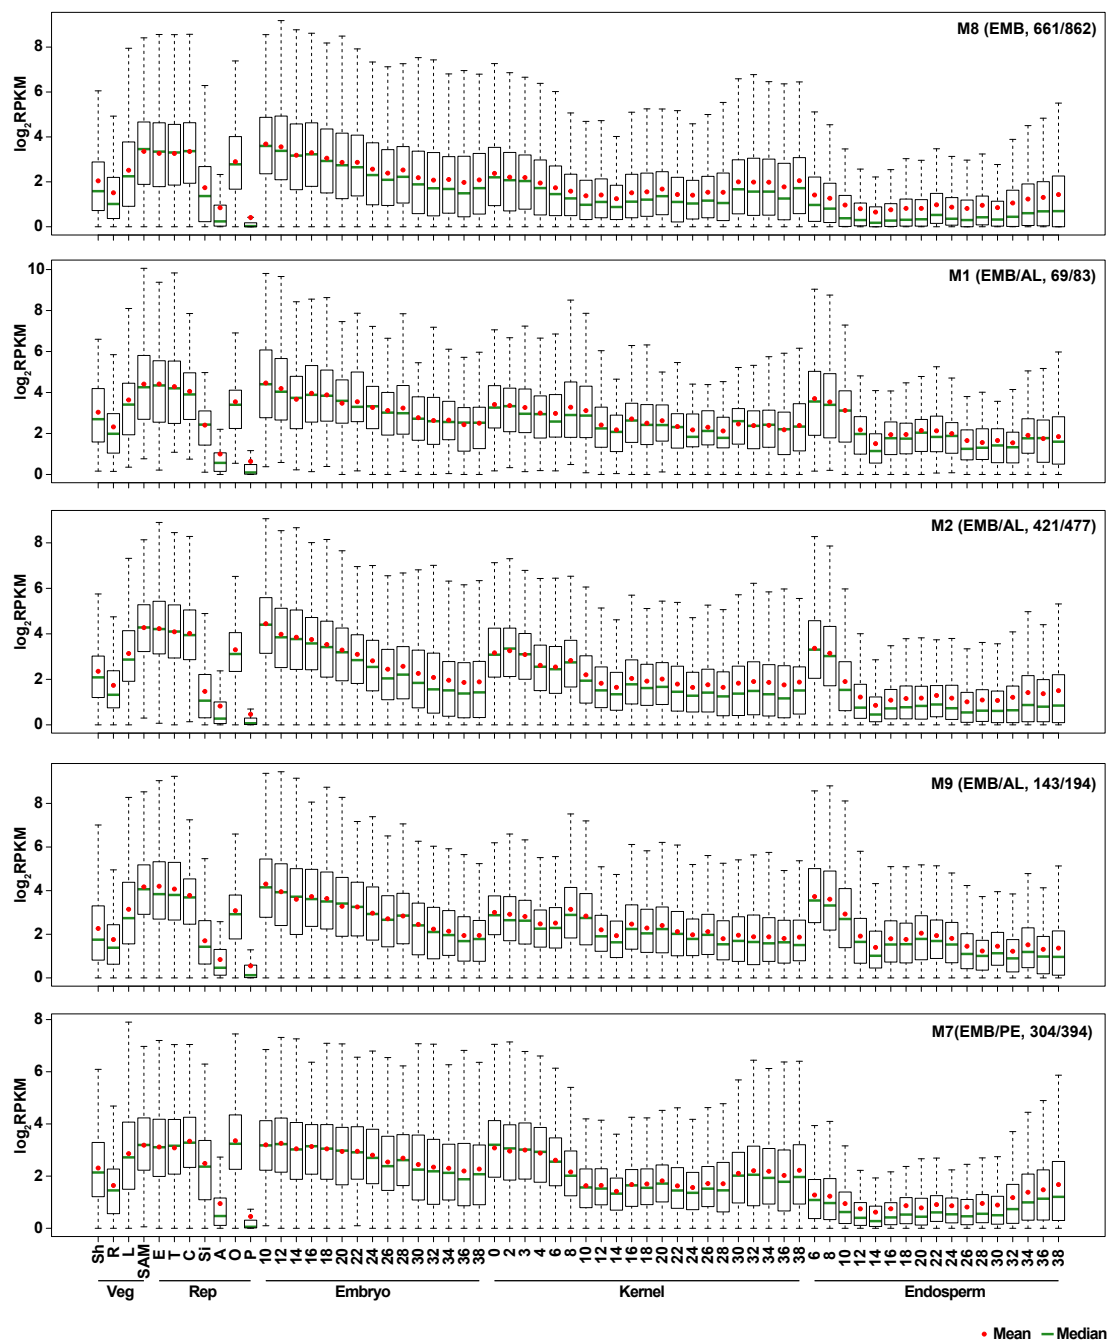

**Supplemental Figure 11.** Expression pattern of genes in the WGCNA co-expression modules (M1, M2, and M9) associated with both AL and EMB (in comparison to the other two EMB-associated modules M7 and M8) based on RNA-Seq data from Chen et al. (2014). The selected data included the same tissues as Supplemental Figure 10. The associated kernel compartment and fractions of genes in each module with available data are indicated in parentheses.



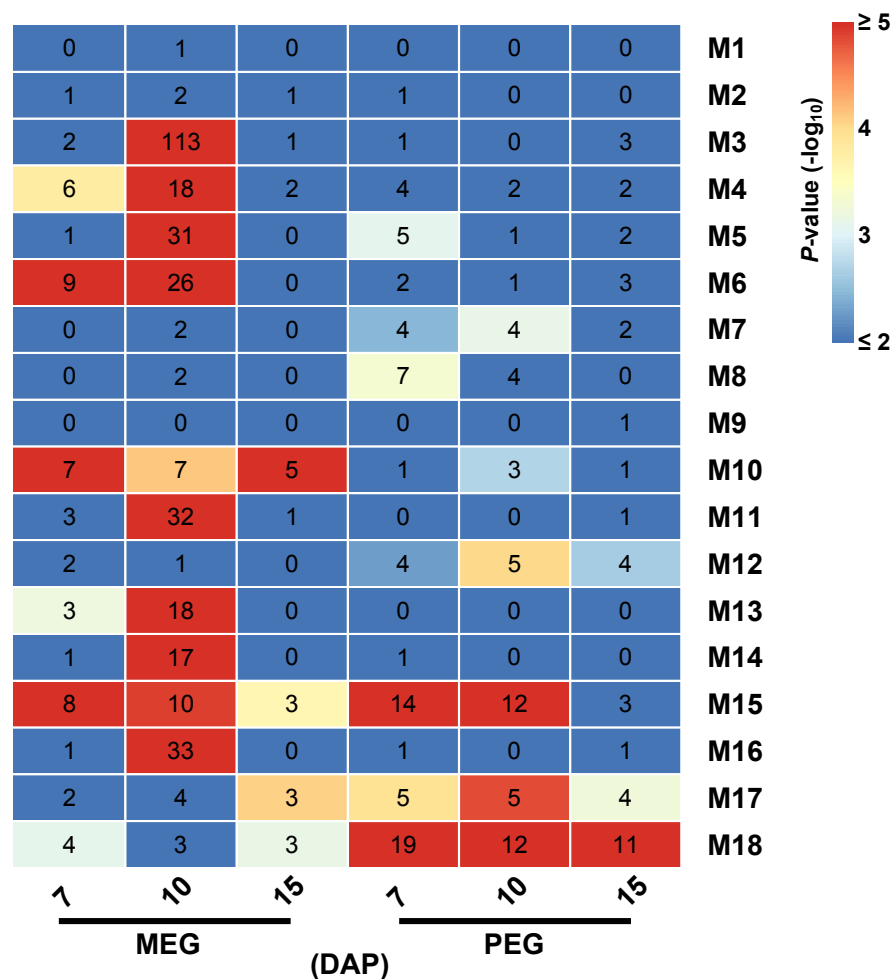

**Supplemental Figure 12.** Relationships of new sets of allele-biased genes with the co-expression modules obtained using WGCNA. The new allele-biased gene sets were identified using the normalized read data from Xin et al. (2013) by applying less stringent criteria, namely, 75% of the maternal reads and 55% of the paternal reads of the SNP associated reads (with a minimum 20 reads) were defined as maternally and paternally biased genes, respectively. The heat map indicates  $P$ -values ( $-\log_{10}$ ) of hypergeometric tests of over-representation of genes in a given tested pair of gene sets. Allele-biased gene sets are noted on the x-axis and all WGCNA co-expression modules on the y-axis. Boxes contain the numbers of overlapping genes. Numbers of genes in each allele-biased gene set: 7-DAP MEG, 73; 10-DAP MEG, 451; 15-DAP MEG, 31; 7-DAP PEG, 172; 10-DAP PEG, 111; 15-DAP PEG, 137.

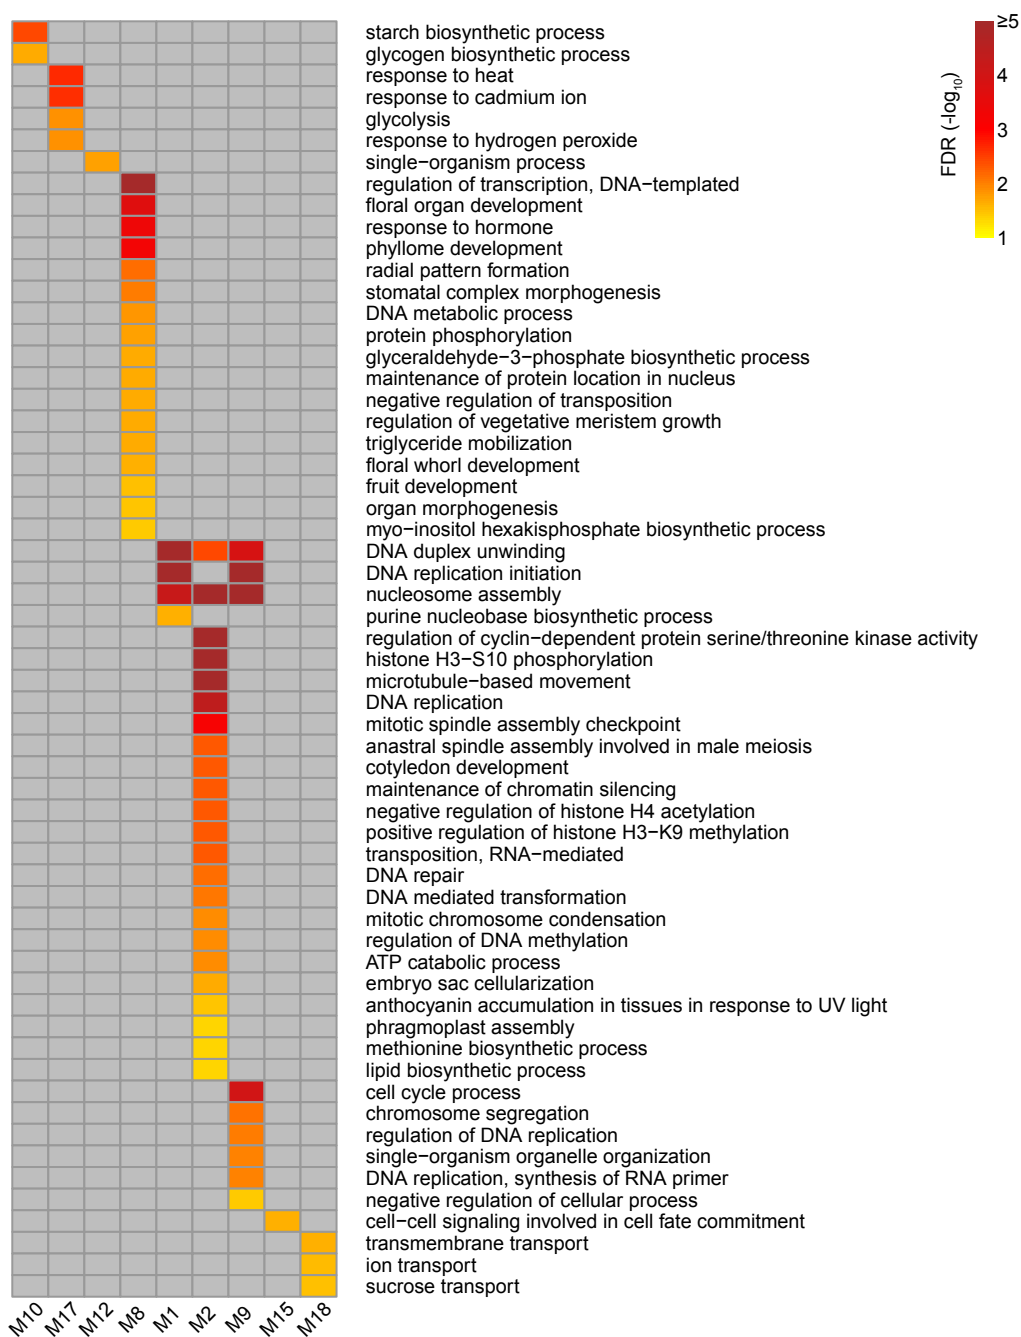

**Supplemental Figure 13.** Enrichment of biological processes in the filial compartment-correlated modules. The heat map indicates enriched GO terms detected for modules M1, M2, M8, M9, M10, M12, M15, M17, and M18 based on FDR ( $-\log_{10}$ ). The grey boxes represent GO terms that are not significantly enriched.

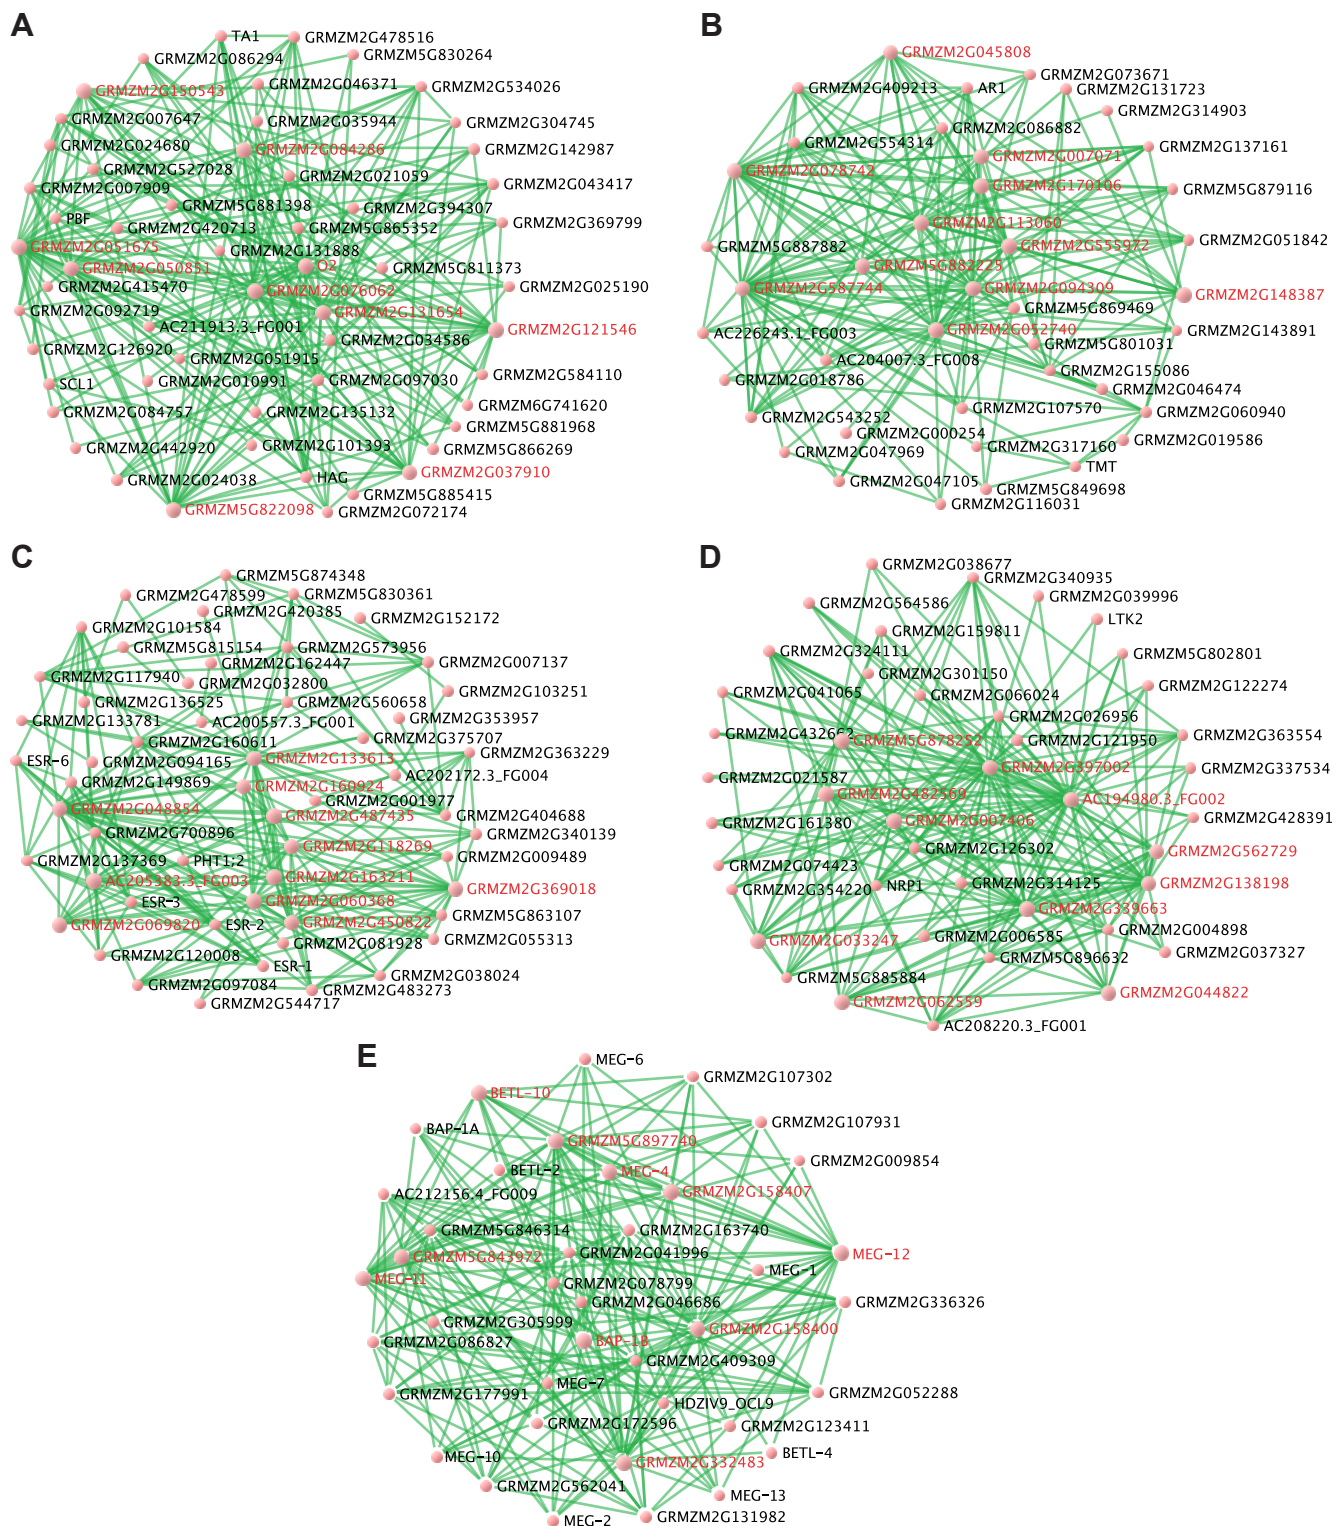

**Supplemental Figure 14.** Visualization of the five endosperm compartment-correlated co-expression modules using the VisANT program. The top 200 connections among top 100 intramodular hub genes (based on kME) are shown for modules M10 (**A**), M12 (**B**), M15 (**C**), M17 (**D**), and M18 (**E**) corresponding to CSE, AL, ESR, CZ, and BETL, respectively. Either a locus name (if available) or a gene ID is used to identify each gene. The 10 to 11 genes with the highest number of connections are shown in a bigger node size with red names/gene IDs.



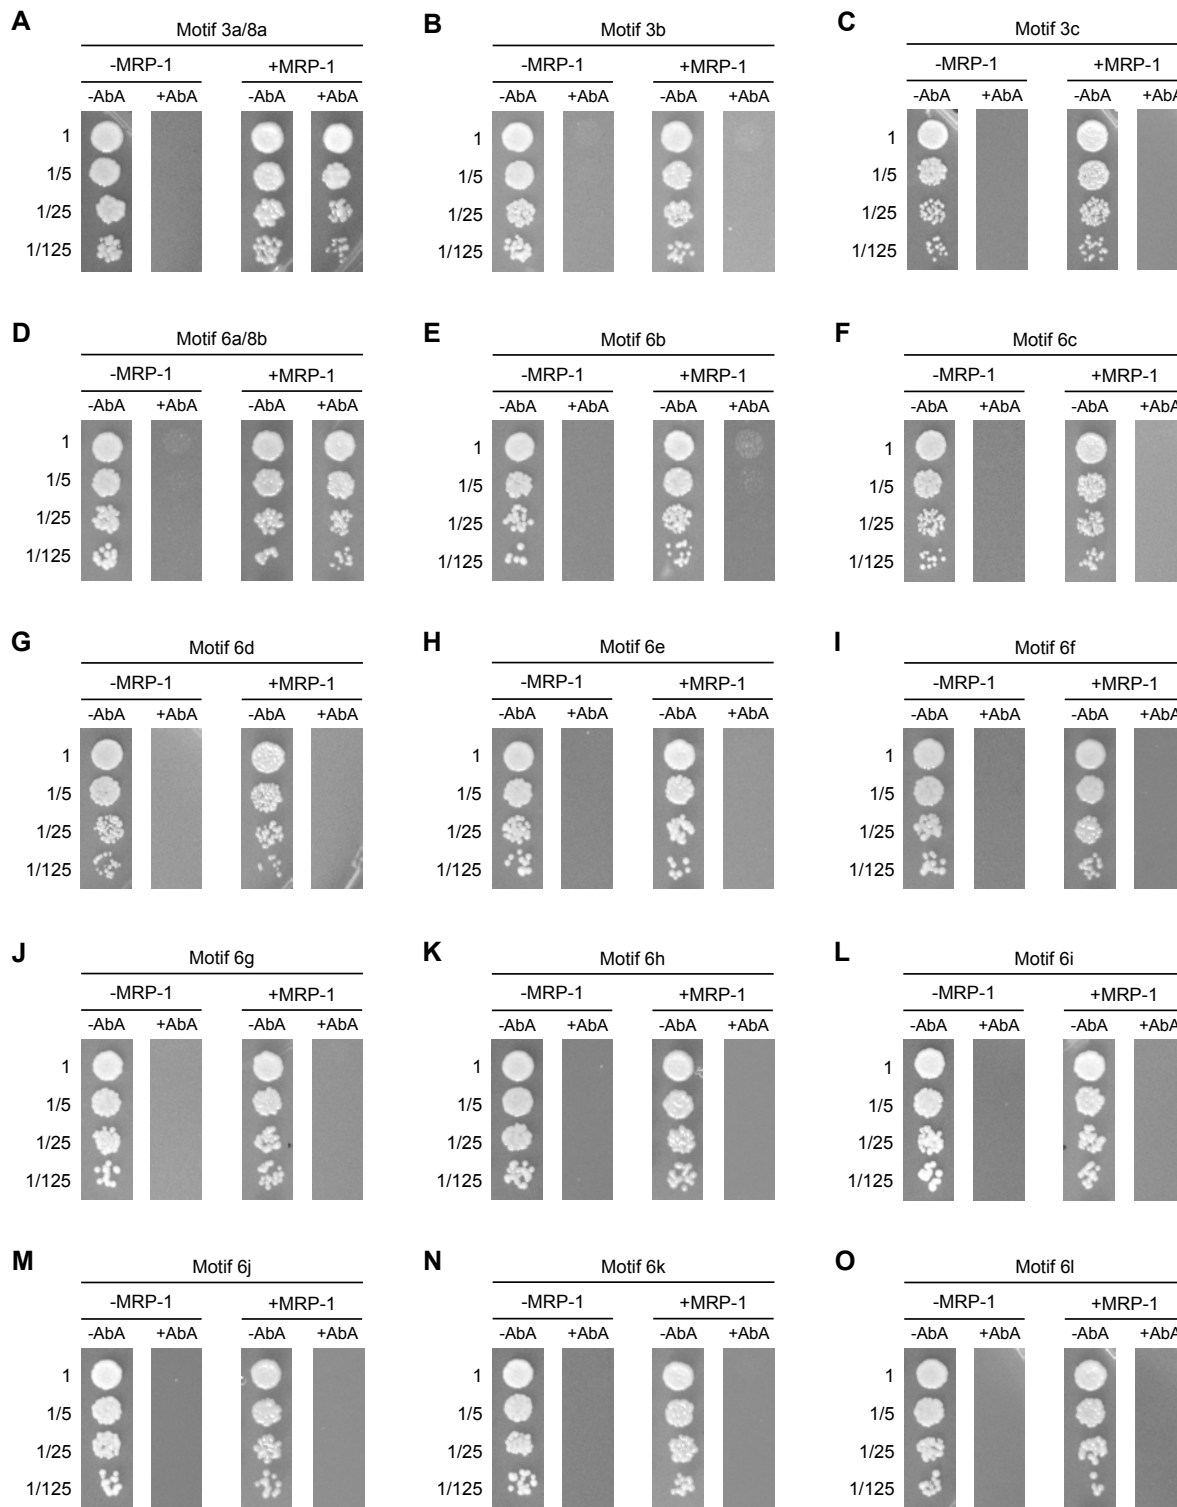

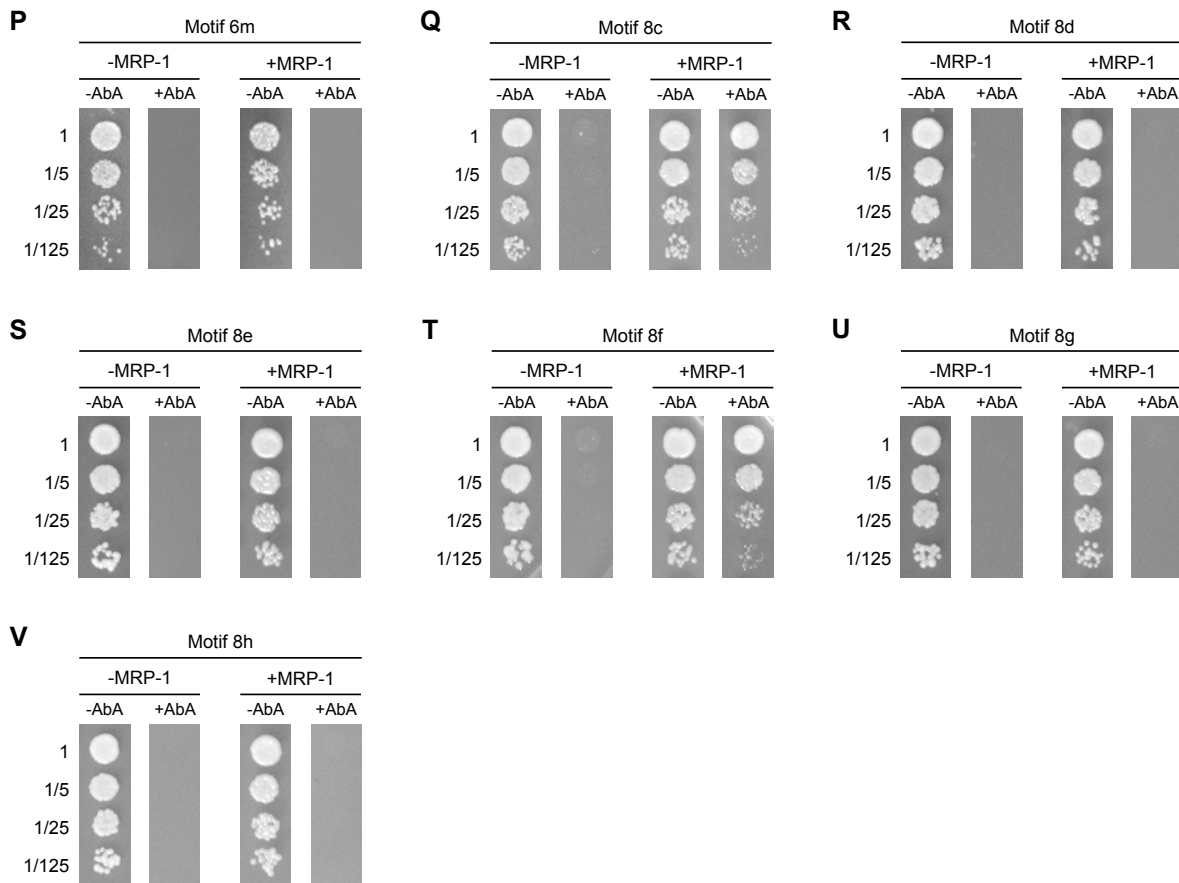

**Supplemental Figure 15.** Yeast one-hybrid assays for binding of MRP-1 to the sequence motifs listed in Table 1. For each motif, two yeast strains were tested, one lacking MRP-1 (-MRP-1) and one expressing MRP-1 (+MRP-1). Each strain was spotted onto plates containing (+AbA) and lacking (-AbA) Aureobasidin A. Each strain was spotted in a 1:5 dilutions series.

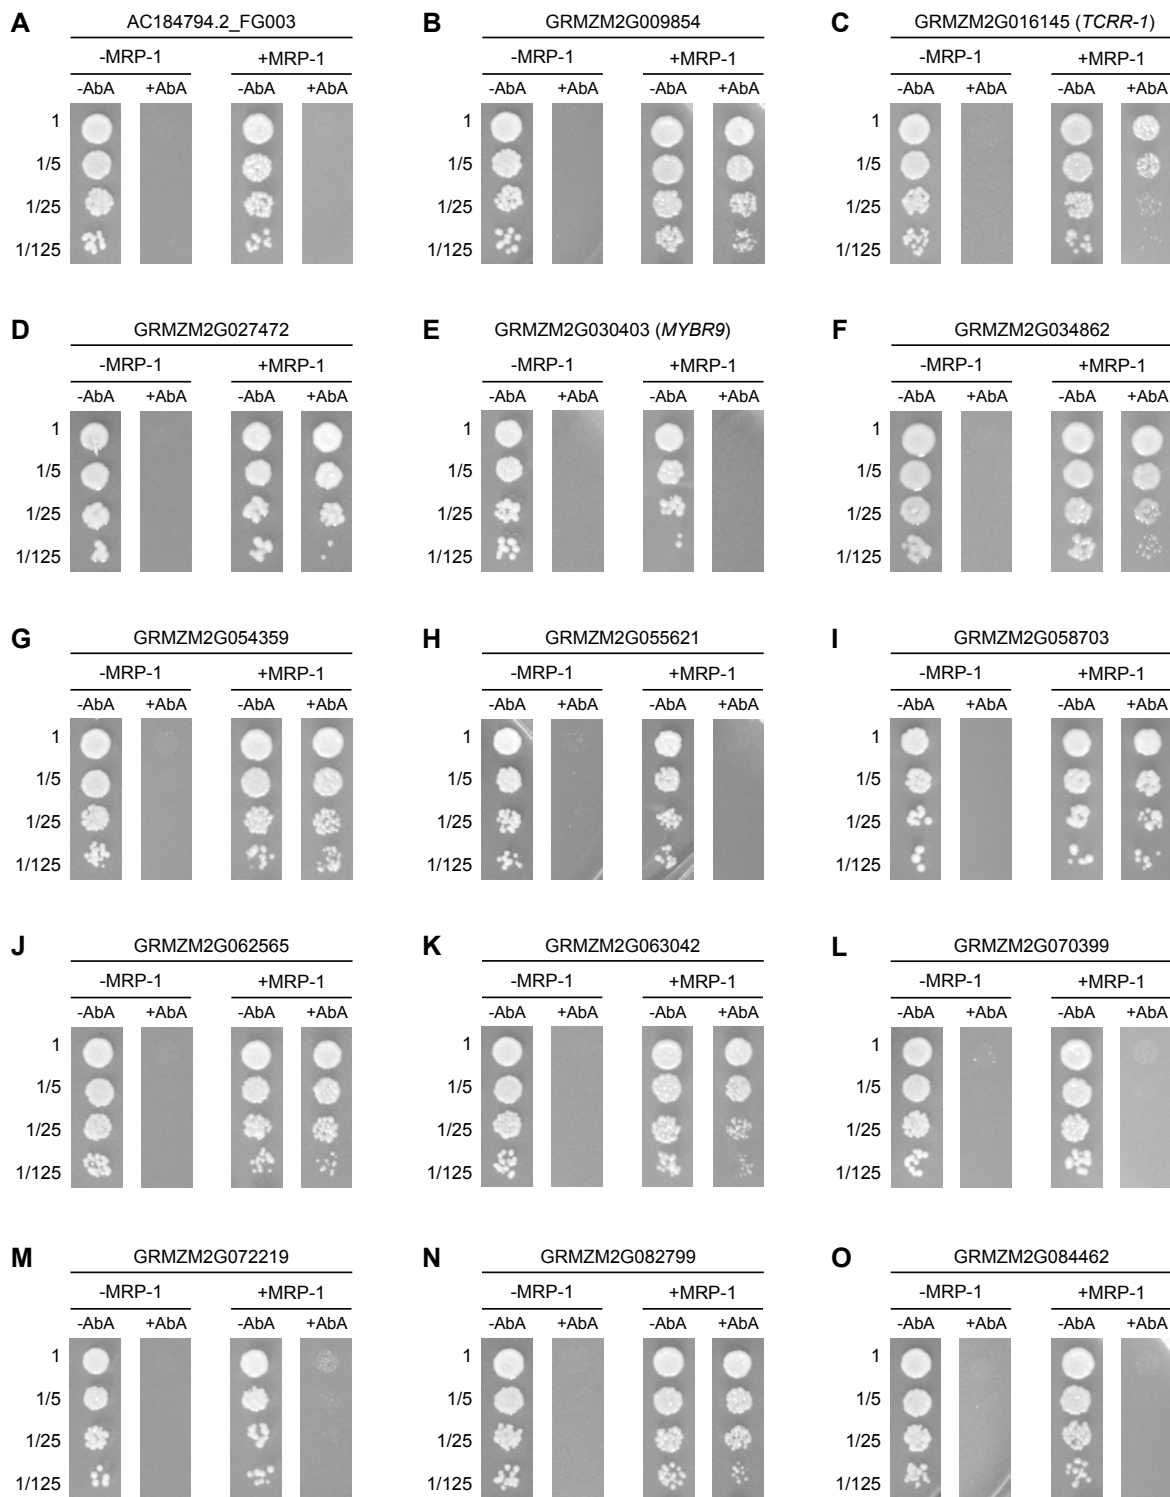



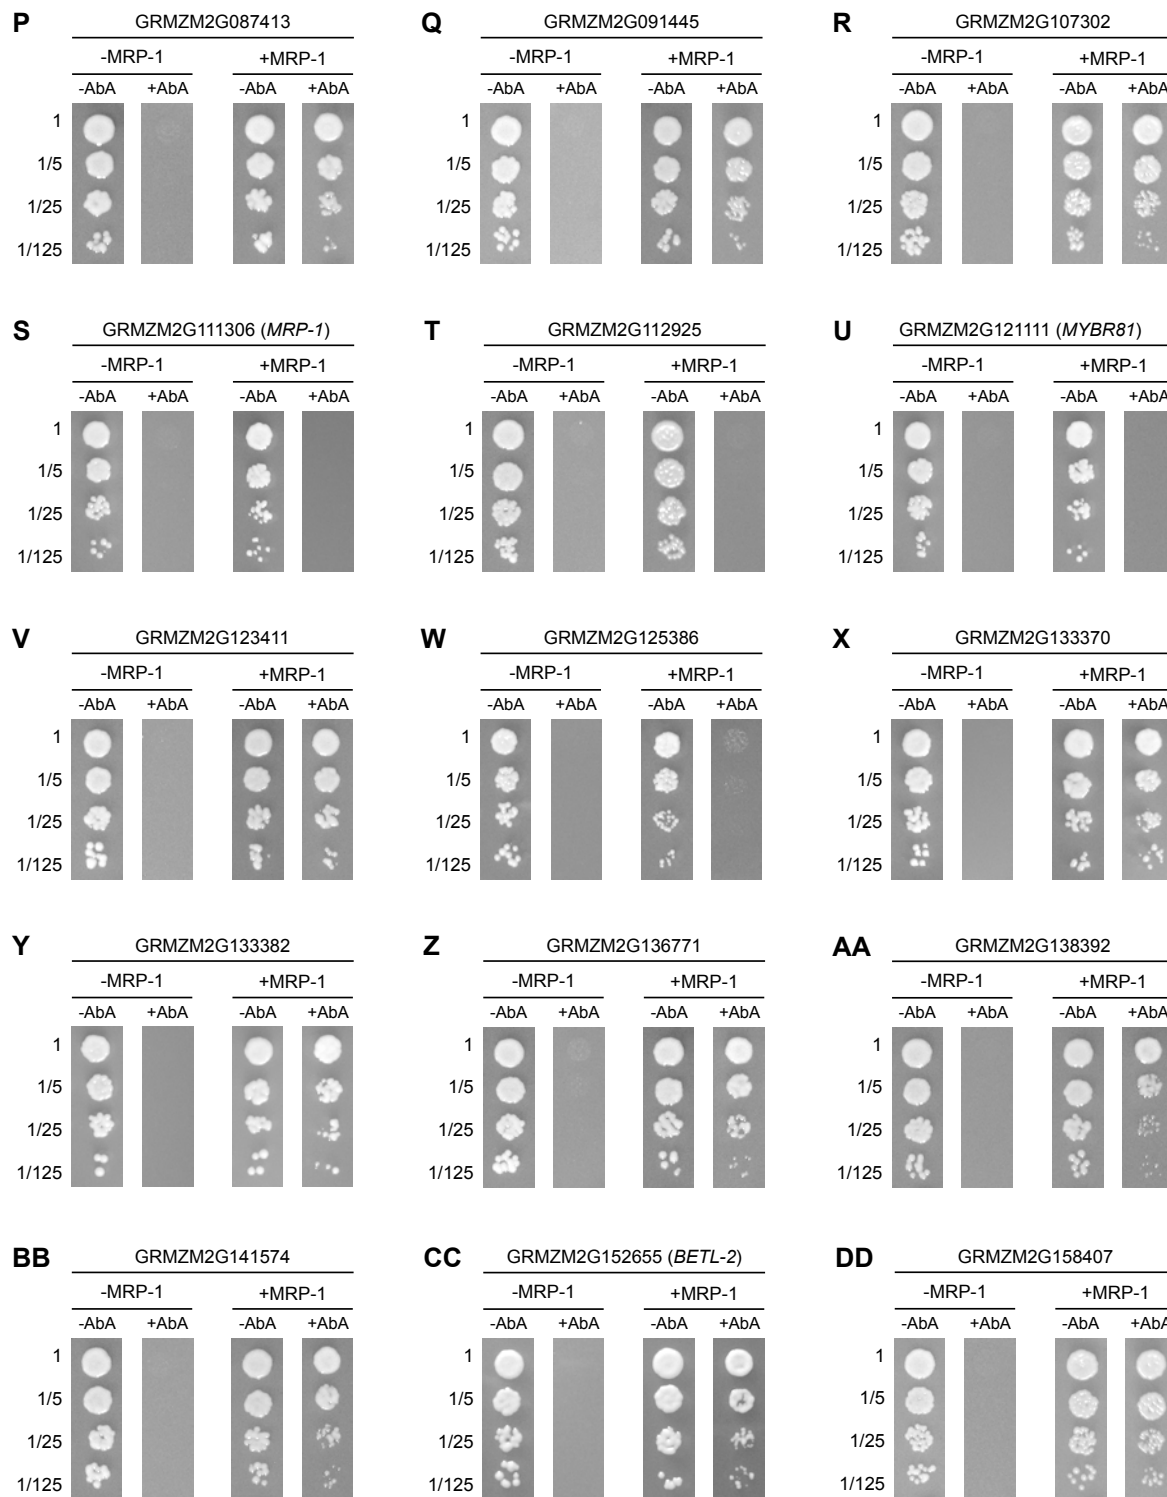

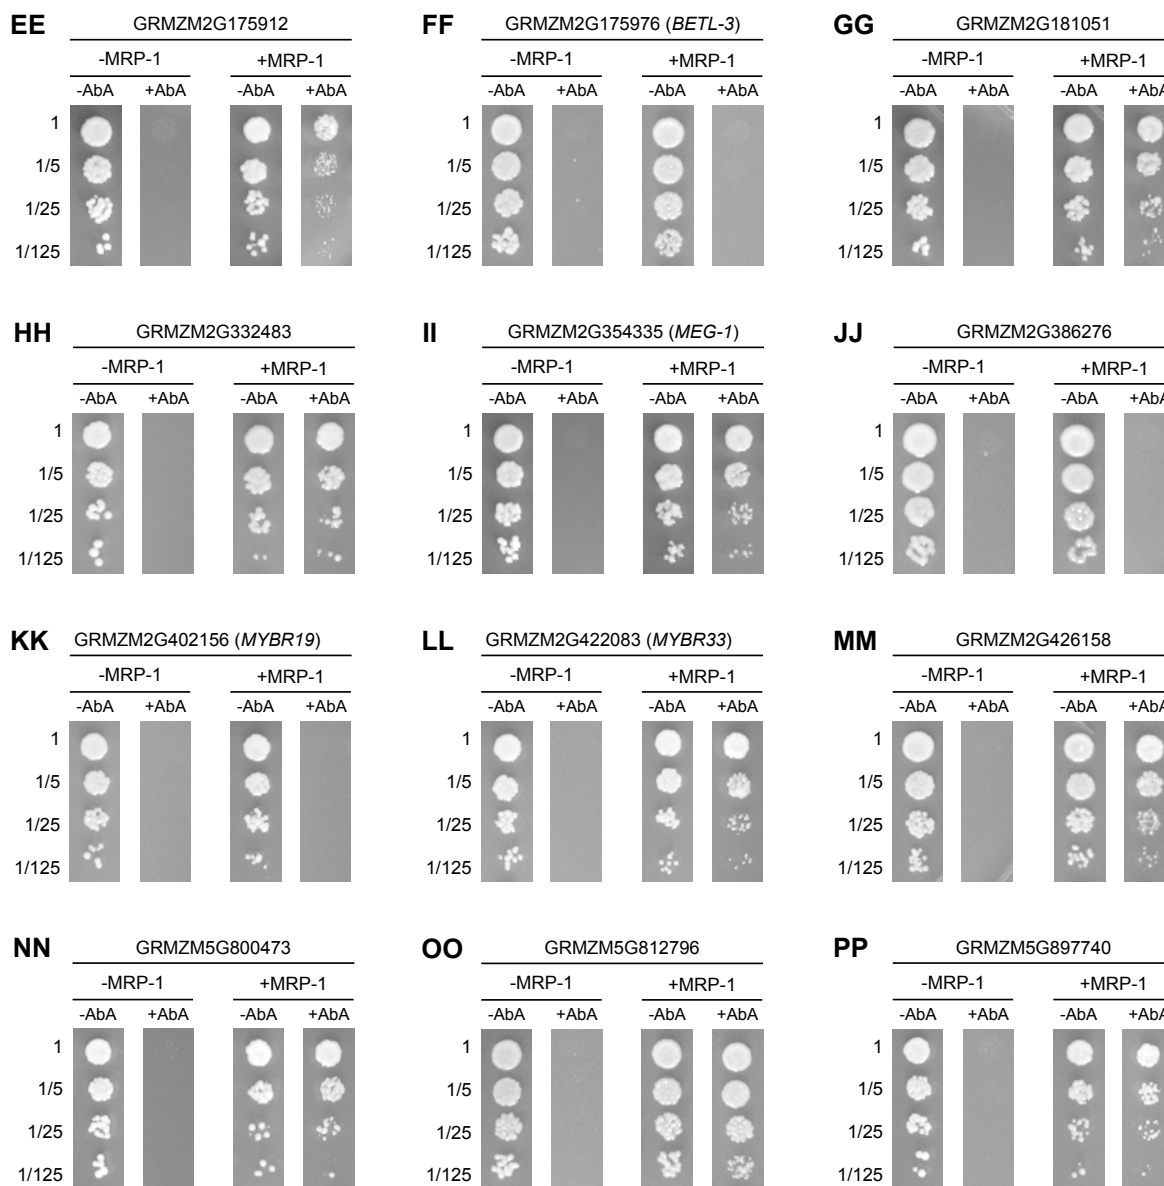

**Supplemental Figure 16.** Yeast one-hybrid assays for binding of MRP-1 to the promoters of the genes listed in Supplemental Table 12. For each promoter, two yeast strains were tested, one lacking MRP-1 (-MRP-1) and one expressing MRP-1 (+MRP-1). Each strain was spotted onto plates containing (+AbA) and lacking (-AbA) Aureobasidin A. Each strain was spotted in a 1:5 dilutions series.

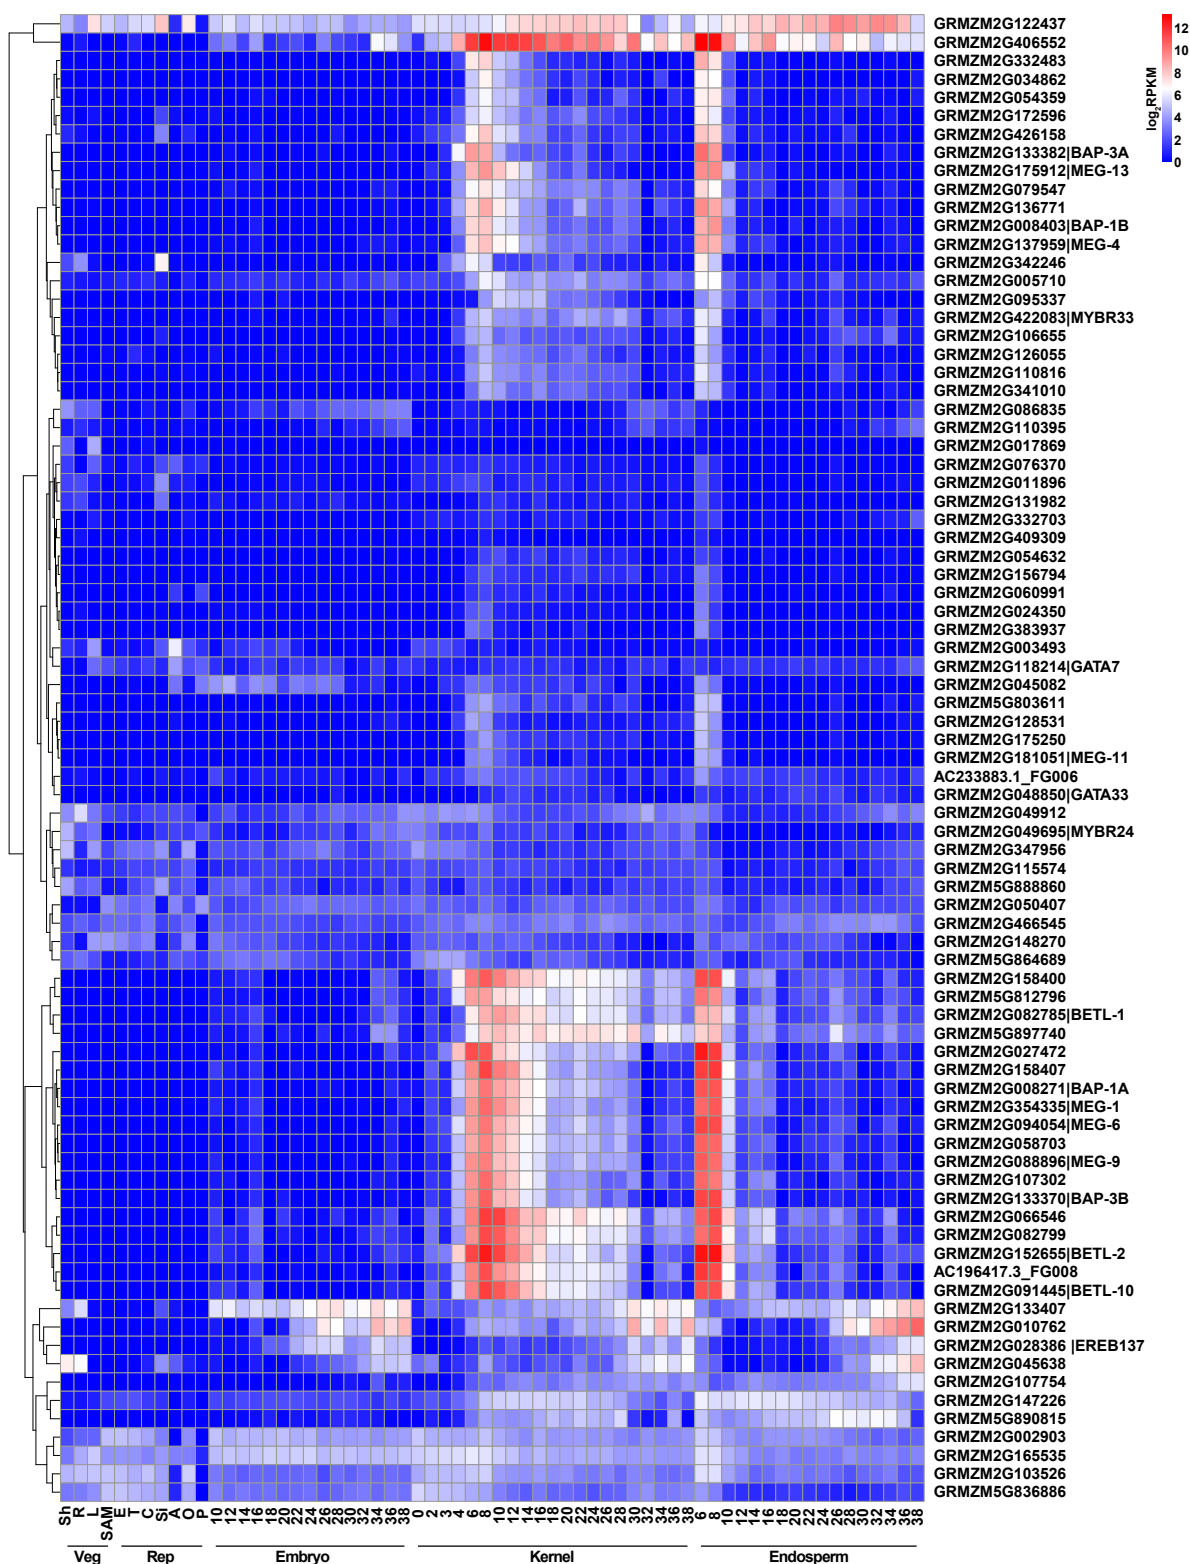

**Supplemental Figure 17.** Expression pattern of the 93 genes containing MRP-1-binding sub-motifs based on RNA-Seq data from Chen et al. (2014). Genes were hierarchically clustered based on Euclidean distance. The selected data included the same tissues as Supplemental Figure 10.

**Supplemental Table 1.** The origins, quality and quantities of RNAs isolated using laser-capture microdissection.

|                   | # kernels |        |        | # sections used |        |        | Total area (mm <sup>2</sup> ) |        |        | RNA quality as RNA Integrity Numbers (RINs) |        |        | Total amount of RNA (ng) |        |        |
|-------------------|-----------|--------|--------|-----------------|--------|--------|-------------------------------|--------|--------|---------------------------------------------|--------|--------|--------------------------|--------|--------|
|                   | Rep. 1    | Rep. 2 | Rep. 3 | Rep. 1          | Rep. 2 | Rep. 3 | Rep. 1                        | Rep. 2 | Rep. 3 | Rep. 1                                      | Rep. 2 | Rep. 3 | Rep. 1                   | Rep. 2 | Rep. 3 |
| CSE               | 9         | 8      | 7      | 26              | 23     | 23     | 36.64                         | 34.69  | 33.67  | 7.10                                        | 6.80   | 6.10   | 236.98                   | 183.70 | 203.13 |
| CZ                | 9         | 7      | 7      | 95              | 137    | 95     | 22.04                         | 33.53  | 35.58  | 6.00                                        | 6.20   | 5.10   | 143.65                   | 156.20 | 195.80 |
| ESR               | 20        | 9      | 9      | 150             | 246    | 208    | 6.86                          | 10.69  | 7.25   | 4.90                                        | 6.50   | 4.20   | 343.18                   | 191.40 | 314.60 |
| BETL              | 6         | 6      | 7      | 150             | 149    | 150    | 15.75                         | 14.77  | 19.34  | 4.10                                        | 4.90   | 3.50   | 556.92                   | 200.20 | 422.40 |
| AL                | 8         | 6      | 6      | 57              | 68     | 63     | 10.77                         | 6.43   | 8.73   | 5.30                                        | 6.30   | 5.00   | 242.01                   | 244.20 | 334.40 |
| EMB               | 11        | 3      | 3      | 89              | 61     | 87     | 8.86                          | 11.15  | 9.52   | 6.00                                        | 5.50   | 4.00   | 101.20                   | 235.40 | 458.04 |
| PC                | -         | -      | 7      | -               | -      | 118    | -                             | -      | 6.09   | -                                           | -      | 2.90   | -                        | -      | 25.62  |
| NU                | -         | 14     | -      | -               | 110    | -      | -                             | 27.15  | -      | -                                           | 4.20   | -      | -                        | 171.60 | -      |
| PE                | -         | 11     | -      | -               | 10     | -      | -                             | 19.70  | -      | -                                           | 4.80   | -      | -                        | 193.60 | -      |
| PED               | -         | 12     | -      | -               | 41     | -      | -                             | 19.39  | -      | -                                           | 5.00   | -      | -                        | 411.40 | -      |
| Control (10 ng)   | -         | -      | -      | -               | -      | -      | -                             | -      | -      | 8.40                                        | 9.00   | 9.00   | -                        | -      | -      |
| Control (5 ng)    | -         | -      | -      | -               | -      | -      | -                             | -      | -      | 8.40                                        | 9.30   | 9.10   | -                        | -      | -      |
| Control (2.50 ng) | -         | -      | -      | -               | -      | -      | -                             | -      | -      | 8.80                                        | 9.40   | 9.20   | -                        | -      | -      |
| Control (1.25 ng) | -         | -      | -      | -               | -      | -      | -                             | -      | -      | 8.10                                        | 8.10   | 9.30   | -                        | -      | -      |

**Supplemental Table 2.** Summary statistics of RNA-Seq reads and mapping.

| Samples <sup>a</sup> | Total # reads | All mapped reads |      | Mapped to exons |                  |
|----------------------|---------------|------------------|------|-----------------|------------------|
|                      |               | #                | %    | #               | %<br>(of mapped) |
| CSE-1                | 10,222,204    | 8,861,426        | 86.7 | 3,299,695       | 37.2             |
| CSE-2                | 31,450,130    | 25,808,488       | 82.1 | 8,616,333       | 33.4             |
| CSE-3                | 33,686,796    | 27,230,237       | 80.8 | 8,924,753       | 32.8             |
| CZ-1                 | 29,475,616    | 24,887,580       | 84.4 | 9,755,319       | 39.2             |
| CZ-2                 | 36,099,924    | 28,111,041       | 77.9 | 10,407,325      | 37.0             |
| CZ-3                 | 31,555,056    | 24,171,723       | 76.6 | 7,456,103       | 30.8             |
| ESR-1                | 40,439,606    | 34,729,514       | 85.9 | 11,344,960      | 32.7             |
| ESR-2                | 33,883,182    | 26,160,199       | 77.2 | 8,323,640       | 31.8             |
| ESR-3                | 32,478,306    | 29,137,023       | 89.7 | 8,238,762       | 28.3             |
| BETL-1               | 17,109,048    | 14,341,367       | 83.8 | 4,599,768       | 32.1             |
| BETL-2               | 27,823,360    | 21,678,667       | 77.9 | 6,237,856       | 28.8             |
| BETL-3               | 29,420,758    | 20,380,515       | 69.3 | 6,319,413       | 31.0             |
| AL-1                 | 11,496,690    | 9,247,655        | 80.4 | 3,581,977       | 38.7             |
| AL-2                 | 30,289,840    | 23,899,741       | 78.9 | 7,937,483       | 33.2             |
| AL-3                 | 21,498,076    | 16,487,384       | 76.7 | 5,114,948       | 31.0             |
| EMB-1                | 23,091,244    | 12,142,139       | 52.6 | 4,792,036       | 39.5             |
| EMB-2                | 21,651,262    | 13,972,219       | 64.5 | 4,075,913       | 29.2             |
| EMB-3                | 22,895,586    | 11,973,058       | 52.3 | 3,284,420       | 27.4             |
| PC                   | 28,140,418    | 21,025,363       | 74.7 | 5,095,299       | 24.2             |
| NU                   | 24,447,238    | 15,850,406       | 64.8 | 4,363,845       | 27.5             |
| PE                   | 23,581,668    | 16,044,397       | 68.0 | 3,549,164       | 22.1             |
| PED                  | 21,838,282    | 13,136,224       | 60.2 | 3,363,514       | 25.6             |

<sup>a</sup>Biological replicates are indicated as -1, -2 and -3.



**Supplemental Table 3.** Number of genes expressed in each of the ten compartments.

| Compartment | Protein-coding genes | Transposable elements | Pseudogenes | miRNAs | TFs   |     | Total # |
|-------------|----------------------|-----------------------|-------------|--------|-------|-----|---------|
|             |                      |                       |             |        | #     | %   |         |
| CSE         | 19,928               | 664                   | 544         | 0      | 1,137 | 5.4 | 21,136  |
| CZ          | 20,775               | 819                   | 646         | 0      | 1,172 | 5.3 | 22,240  |
| ESR         | 22,228               | 925                   | 699         | 1      | 1,305 | 5.5 | 23,853  |
| BETL        | 19,281               | 704                   | 550         | 0      | 1,105 | 5.4 | 20,535  |
| AL          | 20,646               | 680                   | 578         | 0      | 1,173 | 5.4 | 21,904  |
| EMB         | 21,392               | 685                   | 623         | 3      | 1,343 | 5.9 | 22,703  |
| PC          | 15,605               | 354                   | 305         | 0      | 964   | 5.9 | 16,264  |
| NU          | 15,173               | 397                   | 340         | 0      | 899   | 5.7 | 15,910  |
| PE          | 17,615               | 417                   | 369         | 1      | 1,057 | 5.7 | 18,402  |
| PED         | 16,740               | 366                   | 338         | 0      | 1,040 | 6.0 | 17,444  |

**Supplemental Table 4.** Number of genes expressed at different FPKM levels in the ten compartments.

| Compartment | FPKM < 2 |       | 2 ≤ FPKM < 10 |       | 10 ≤ FPKM < 200 |       | FPKM ≥ 200 |      |
|-------------|----------|-------|---------------|-------|-----------------|-------|------------|------|
|             | #        | %     | #             | %     | #               | %     | #          | %    |
| CSE         | 14,501   | 47.29 | 7185          | 23.43 | 8,509           | 27.75 | 470        | 1.53 |
| CZ          | 14,438   | 47.08 | 7570          | 24.69 | 8,237           | 26.86 | 420        | 1.37 |
| ESR         | 13,859   | 45.19 | 7244          | 23.62 | 9,315           | 30.38 | 247        | 0.81 |
| BETL        | 15,585   | 50.82 | 6104          | 19.91 | 8,685           | 28.32 | 291        | 0.95 |
| AL          | 12,839   | 41.87 | 8204          | 26.75 | 9,182           | 29.94 | 440        | 1.43 |
| EMB         | 11,112   | 36.24 | 9395          | 30.64 | 9,765           | 31.84 | 393        | 1.28 |
| PC          | 15,613   | 50.91 | 7098          | 23.15 | 7,647           | 24.94 | 307        | 1.00 |
| NU          | 14,905   | 48.61 | 7699          | 25.11 | 7,748           | 25.27 | 313        | 1.02 |
| PE          | 11,176   | 36.45 | 10197         | 33.25 | 9,001           | 29.35 | 291        | 0.95 |
| PED         | 12,354   | 40.29 | 9273          | 30.24 | 8,712           | 28.41 | 326        | 1.06 |

**Supplemental Table 5.** Summary of principle component analysis (PCA) of the ten compartments. Ten principle components (PCs) of each of the ten kernel compartments, the standard deviation of each PC, and the percentage of variance explained by each PC are shown.

|                          | PC1    | PC2    | PC3    | PC4    | PC5   | PC6   | PC7   | PC8   | PC9   | PC10     |
|--------------------------|--------|--------|--------|--------|-------|-------|-------|-------|-------|----------|
| AL                       | -91.9  | 66.0   | -1.3   | 57.3   | 0.6   | 17.4  | 34.3  | 93.6  | -20.3 | 1.7E-12  |
| BETL                     | -72.2  | -125.1 | 26.8   | -64.2  | -18.2 | -70.6 | -58.0 | 42.6  | 12.9  | -2.1E-13 |
| CSE                      | -99.2  | -6.0   | -12.1  | 32.0   | 41.2  | 81.2  | -15.1 | -15.5 | 55.4  | 6.8E-13  |
| CZ                       | -102.3 | -51.3  | -0.9   | -14.6  | 34.3  | 51.8  | -29.3 | -46.6 | -54.7 | -3.8E-13 |
| EMB                      | -55.3  | 152.4  | 3.7    | 58.4   | -31.7 | -82.5 | -33.9 | -44.8 | 2.3   | 9.1E-13  |
| ESR                      | -71.3  | -44.3  | 8.3    | -47.5  | -32.0 | -31.7 | 105.5 | -35.6 | 7.2   | 4.3E-13  |
| NU                       | 112.3  | -30.5  | -180.6 | 5.5    | 27.0  | -22.9 | 1.5   | 3.3   | -1.6  | -8.6E-13 |
| PC                       | 146.2  | -106.4 | 58.8   | 99.4   | -73.0 | 22.4  | -1.4  | -8.7  | -2.6  | -1.2E-12 |
| PE                       | 97.0   | 111.6  | 7.6    | -107.5 | -71.9 | 62.0  | -16.1 | 9.1   | 0.9   | -8.3E-13 |
| PED                      | 136.7  | 33.8   | 89.8   | -18.8  | 123.7 | -27.0 | 12.5  | 2.7   | 0.5   | -2.2E-13 |
| Standard deviation       | 107.6  | 90.5   | 70.8   | 63.4   | 59.4  | 55.8  | 45.1  | 42.7  | 27.3  | 2.5E-13  |
| % of variance            | 28.9   | 20.5   | 12.5   | 10.0   | 8.8   | 7.8   | 5.1   | 4.6   | 1.9   | 0.0      |
| Cumulative % of variance | 28.9   | 49.4   | 61.9   | 71.9   | 80.7  | 88.5  | 93.6  | 98.1  | 100.0 | 100.0    |

**Supplemental Table 6.** Summary of the available *in situ* hybridization and promoter analysis data for endosperm cell-specific genes.

| Gene ID          | Locus Name           | Cell Type | CS Score | Assays                                           | References                               |
|------------------|----------------------|-----------|----------|--------------------------------------------------|------------------------------------------|
| GRMZM2G170400    | PEAMT                | AL        | 0.94     | <i>In situ</i> hybridization                     | This study                               |
| GRMZM2G437435    | -                    | AL        | 0.90     | <i>In situ</i> hybridization                     | This study                               |
| GRMZM2G091774    | -                    | AL        | 0.87     | <i>In situ</i> hybridization                     | This study                               |
| GRMZM2G069095    | VPP1                 | AL        | 0.70     | <i>In situ</i> hybridization                     | Wisniewski et al. (2004)                 |
| GRMZM2G091054    | AL-9                 | AL        | 0.51     | <i>In situ</i> hybridization;<br>promoter fusion | Li et al. (2014);<br>Gómez et al. (2009) |
| AC199820.4_FG006 | -                    | BETL      | 0.99     | <i>In situ</i> hybridization                     | Li et al. (2014)                         |
| GRMZM2G016145    | TCRR-1               | BETL      | 0.99     | <i>In situ</i> hybridization                     | Muñiz et al. (2006)                      |
| GRMZM2G426158    | -                    | BETL      | 0.99     | <i>In situ</i> hybridization                     | This study                               |
| GRMZM2G111306    | MRP1                 | BETL      | 0.99     | <i>In situ</i> hybridization                     | Gómez et al. (2002)                      |
| GRMZM2G133382    | BAP-3A               | BETL      | 0.99     | <i>In situ</i> hybridization                     | Serna et al. (2001)                      |
| GRMZM2G132162    | -                    | BETL      | 0.99     | <i>In situ</i> hybridization                     | This study                               |
| GRMZM2G072219    | -                    | BETL      | 0.99     | <i>In situ</i> hybridization                     | Li et al. (2014)                         |
| GRMZM2G073290    | BETL-4               | BETL      | 0.97     | <i>In situ</i> hybridization                     | Hueros et al. (1999)                     |
| GRMZM2G158400    | -                    | BETL      | 0.97     | <i>In situ</i> hybridization                     | This study                               |
| GRMZM2G332483    | -                    | BETL      | 0.97     | <i>In situ</i> hybridization                     | This study                               |
| GRMZM2G121137    | -                    | BETL      | 0.96     | <i>In situ</i> hybridization                     | This study                               |
| GRMZM2G354335    | MEG-1                | BETL      | 0.96     | <i>In situ</i> hybridization;<br>promoter fusion | Gutiérrez-Marcos et al.<br>(2004)        |
| GRMZM2G008271    | BAP-1A               | BETL      | 0.95     | <i>In situ</i> hybridization                     | This study;<br>Serna et al. (2001)       |
| GRMZM2G107302    | -                    | BETL      | 0.94     | <i>In situ</i> hybridization                     | This study                               |
| GRMZM2G123411    | -                    | BETL      | 0.93     | <i>In situ</i> hybridization                     | This study                               |
| GRMZM2G175912    | MEG-13               | BETL      | 0.93     | <i>In situ</i> hybridization                     | This study                               |
| GRMZM2G058703    | -                    | BETL      | 0.92     | <i>In situ</i> hybridization                     | This study                               |
| GRMZM2G158407    | -                    | BETL      | 0.92     | <i>In situ</i> hybridization                     | This study                               |
| GRMZM2G152655    | BAP-2                | BETL      | 0.89     | <i>In situ</i> hybridization                     | Hueros et al. (1999)                     |
| GRMZM5G812796    | -                    | BETL      | 0.89     | <i>In situ</i> hybridization                     | This study                               |
| GRMZM2G167733    | EBE-2                | BETL      | 0.86     | <i>In situ</i> hybridization;<br>promoter fusion | Magnard et al. (2003)                    |
| GRMZM2G082785    | BETL-1               | BETL      | 0.79     | <i>In situ</i> hybridization                     | Hueros et al. (1995)                     |
| GRMZM2G401374    | CC8                  | BETL      | 0.76     | <i>In situ</i> hybridization                     | Massonneau et al. (2005)                 |
| GRMZM2G087413    | BETL-9               | BETL      | 0.74     | <i>In situ</i> hybridization;<br>promoter fusion | This study;<br>Royo et al. (2014)        |
| GRMZM2G090264    | TCRR-2               | BETL      | 0.57     | <i>In situ</i> hybridization                     | Muñiz et al. (2010)                      |
| GRMZM2G138727    | 27-kD $\gamma$ -zein | CSE       | 0.96     | <i>In situ</i> hybridization                     | Woo et al. (2001)                        |
| GRMZM2G060429    | 16-kD $\gamma$ -zein | CSE       | 0.95     | <i>In situ</i> hybridization                     | Woo et al. (2001)                        |
| GRMZM2G089713    | Sh1                  | CSE       | 0.89     | <i>In situ</i> hybridization                     | This study                               |
| GRMZM2G369799    | -                    | CSE       | 0.77     | <i>In situ</i> hybridization                     | Li et al. (2014)                         |
| GRMZM2G429899    | Sh2                  | CSE       | 0.68     | <i>In situ</i> hybridization                     | This study                               |
| GRMZM2G023872    | SCL1                 | CSE       | 0.60     | <i>In situ</i> hybridization                     | Li et al. (2014)                         |
| GRMZM2G154182    | ASN1                 | CSE       | 0.47     | <i>In situ</i> hybridization                     | Li et al. (2014)                         |
| GRMZM2G006585    | -                    | CZ        | 0.70     | <i>In situ</i> hybridization                     | Li et al. (2014)                         |
| GRMZM2G315601    | ESR-2                | ESR       | 0.99     | <i>In situ</i> hybridization                     | Li et al. (2014)                         |
| GRMZM2G048353    | ESR-6                | ESR       | 0.99     | <i>In situ</i> hybridization                     | Balandín et al. (2005)                   |
| GRMZM2G149869    | -                    | ESR       | 0.99     | <i>In situ</i> hybridization                     | This study                               |
| GRMZM2G120008    | -                    | ESR       | 0.99     | <i>In situ</i> hybridization                     | Li et al. (2014)                         |
| GRMZM2G046086    | ESR-1                | ESR       | 0.99     | <i>In situ</i> hybridization                     | Li et al. (2014)                         |
| GRMZM2G372553    | AE3                  | ESR       | 0.54     | <i>In situ</i> hybridization                     | Magnard et al. (2000)                    |

**Supplemental Table 7.** Robustness of WGCNA-generated co-expression modules based on a permutation test of average topological overlap (TO).

| Module | Mean TO observed <sup>a</sup> | Mean TO random <sup>b</sup> | Maximal TO random <sup>c</sup> | P-value <sup>d</sup> |
|--------|-------------------------------|-----------------------------|--------------------------------|----------------------|
| 1      | 0.20032682                    | 0.04206503                  | 0.05808373                     | < 10 <sup>-5</sup>   |
| 2      | 0.13829484                    | 0.03242548                  | 0.03794889                     | < 10 <sup>-5</sup>   |
| 3      | 0.05589406                    | 0.03135009                  | 0.03492353                     | < 10 <sup>-5</sup>   |
| 4      | 0.05180793                    | 0.03119400                  | 0.03506029                     | < 10 <sup>-5</sup>   |
| 5      | 0.11182849                    | 0.03251804                  | 0.03856629                     | < 10 <sup>-5</sup>   |
| 6      | 0.05307235                    | 0.03117166                  | 0.03413336                     | < 10 <sup>-5</sup>   |
| 7      | 0.10177977                    | 0.03284855                  | 0.03858159                     | < 10 <sup>-5</sup>   |
| 8      | 0.05829481                    | 0.03152054                  | 0.03555416                     | < 10 <sup>-5</sup>   |
| 9      | 0.26306783                    | 0.03539109                  | 0.04476182                     | < 10 <sup>-5</sup>   |
| 10     | 0.11657907                    | 0.03440147                  | 0.04239688                     | < 10 <sup>-5</sup>   |
| 11     | 0.04351963                    | 0.03179076                  | 0.03609683                     | < 10 <sup>-5</sup>   |
| 12     | 0.08102435                    | 0.03258770                  | 0.03830303                     | < 10 <sup>-5</sup>   |
| 13     | 0.11766000                    | 0.03433284                  | 0.04294189                     | < 10 <sup>-5</sup>   |
| 14     | 0.14466003                    | 0.03906574                  | 0.05298123                     | < 10 <sup>-5</sup>   |
| 15     | 0.05718379                    | 0.03269729                  | 0.03842810                     | < 10 <sup>-5</sup>   |
| 16     | 0.10289539                    | 0.03315041                  | 0.04010339                     | < 10 <sup>-5</sup>   |
| 17     | 0.11984522                    | 0.03364567                  | 0.04121327                     | < 10 <sup>-5</sup>   |
| 18     | 0.07067248                    | 0.03197153                  | 0.03666547                     | < 10 <sup>-5</sup>   |

<sup>a</sup> the average TO for the genes in an observed module.

<sup>b</sup> the average TO of 100,000 iterations.

<sup>c</sup> the maximum of the average TO for the 100,000 iterations.

<sup>d</sup> the empirical probability of finding an average TO greater than or equal to the observed TO in 100, 000 collections of modules comprised of randomly selected genes.



**Supplemental Table 8.** Allele-biased genes enriched in the endosperm-associated co-expression modules M10, M15, M17, and M18.

| Gene ID          | Module | Allelic Expression Pattern | Stringency <sup>a</sup> | TF Family | Functional Annotation                                                                 |
|------------------|--------|----------------------------|-------------------------|-----------|---------------------------------------------------------------------------------------|
| GRMZM2G014119    | 10     | MEG                        | High                    | -         | Uncharacterized protein                                                               |
| GRMZM2G170099    | 10     | MEG                        | High                    | -         | Uncharacterized protein                                                               |
| GRMZM2G169695    | 10     | MEG                        | High                    | -         | AT-rich element binding factor 3                                                      |
| GRMZM2G124708    | 10     | MEG                        | High                    | -         | -                                                                                     |
| GRMZM2G121546    | 10     | MEG                        | Low                     | -         | Uncharacterized protein                                                               |
| GRMZM2G072174    | 10     | MEG                        | Low                     | -         | Uncharacterized protein                                                               |
| GRMZM2G154182    | 10     | MEG                        | Low                     | NAC       | Putative NAC domain transcription factor superfamily protein; Uncharacterized protein |
| GRMZM2G500698    | 10     | MEG                        | Low                     | -         | -                                                                                     |
| GRMZM2G170201    | 10     | PEG                        | High                    | Orphans   | Paired amphipathic helix repeat family protein                                        |
| GRMZM2G043417    | 10     | PEG                        | High                    | -         | -                                                                                     |
| GRMZM2G059102    | 10     | PEG                        | Low                     | MADS      | MADS-box transcription factor 47; Uncharacterized protein                             |
| GRMZM2G359589    | 15     | MEG                        | High                    | C2H2      | Uncharacterized protein                                                               |
| GRMZM2G370991    | 15     | MEG                        | High                    | -         | Uncharacterized protein                                                               |
| GRMZM2G343972    | 15     | MEG                        | High                    | -         | Uncharacterized protein                                                               |
| GRMZM2G130580    | 15     | MEG                        | High                    | Orphans   | Uncharacterized protein                                                               |
| GRMZM2G024468    | 15     | MEG                        | High                    | MYB       | Uncharacterized protein                                                               |
| GRMZM2G150680    | 15     | MEG                        | High                    | MYB       | Putative MYB DNA-binding domain superfamily protein; Uncharacterized protein          |
| GRMZM2G069840    | 15     | MEG                        | High                    | -         | -                                                                                     |
| GRMZM2G476175    | 15     | MEG                        | High                    | -         | -                                                                                     |
| GRMZM2G120085    | 15     | MEG                        | Low                     | -         | Uncharacterized protein                                                               |
| GRMZM2G474602    | 15     | MEG                        | Low                     | -         | -                                                                                     |
| GRMZM2G092101    | 15     | PEG                        | High                    | -         | Uncharacterized protein                                                               |
| GRMZM2G103164    | 15     | PEG                        | High                    | -         | Putative leucine-rich repeat receptor-like protein kinase family protein              |
| GRMZM2G324131    | 15     | PEG                        | High                    | C2C2-GATA | Putative GATA transcription factor family protein                                     |
| GRMZM5G830365    | 15     | PEG                        | High                    | -         | Putative AP2/EREBP transcription factor superfamily protein                           |
| GRMZM2G089562    | 15     | PEG                        | High                    | -         | DNA-binding protein; Uncharacterized protein                                          |
| AC209624.2_FG001 | 15     | PEG                        | High                    | -         | -                                                                                     |
| AC209624.2_FG003 | 15     | PEG                        | High                    | -         | -                                                                                     |
| GRMZM2G028366    | 15     | PEG                        | High                    | -         | -                                                                                     |
| GRMZM2G093947    | 15     | PEG                        | High                    | -         | -                                                                                     |
| GRMZM2G374169    | 15     | PEG                        | High                    | -         | -                                                                                     |
| GRMZM2G494808    | 15     | PEG                        | High                    | -         | -                                                                                     |
| GRMZM2G099353    | 15     | PEG                        | Low                     | -         | Uncharacterized protein                                                               |
| GRMZM2G110531    | 15     | PEG                        | Low                     | Orphans   | Speckle-type POZ protein                                                              |
| GRMZM2G004334    | 15     | PEG                        | Low                     | Homeobox  | Putative homeobox/lipid-binding domain family protein                                 |
| GRMZM2G450822    | 15     | PEG                        | Low                     | -         | -                                                                                     |
| GRMZM2G062650    | 17     | MEG                        | High                    | NAC       | NAM-related protein 1                                                                 |
| GRMZM2G063498    | 17     | MEG                        | High                    | -         | -                                                                                     |

| Supplemental Table 8 Continued |    |     |      |           |                                                                                      |
|--------------------------------|----|-----|------|-----------|--------------------------------------------------------------------------------------|
| GRMZM2G041065                  | 17 | MEG | High | -         | Pyrophosphate-energized vacuolar membrane proton pump                                |
| GRMZM2G179777                  | 17 | MEG | Low  | -         | Triacylglycerol lipase                                                               |
| GRMZM2G085078                  | 17 | MEG | Low  | -         | -                                                                                    |
| GRMZM2G047104                  | 17 | PEG | High | -         | Putative homeodomain-like transcription factor superfamily protein                   |
| AC191534.3_FG003               | 17 | PEG | High | -         | -                                                                                    |
| GRMZM2G006732                  | 17 | PEG | High | -         | -                                                                                    |
| GRMZM2G339663                  | 17 | PEG | High | -         | -                                                                                    |
| GRMZM5G897856                  | 17 | PEG | High | -         | -                                                                                    |
| GRMZM2G112925                  | 18 | MEG | High | Orphans   | -                                                                                    |
| GRMZM2G103247                  | 18 | MEG | Low  | Orphans   | Uncharacterized protein                                                              |
| GRMZM2G147226                  | 18 | MEG | Low  | -         | Uncharacterized protein                                                              |
| GRMZM2G012071                  | 18 | MEG | Low  | -         | -                                                                                    |
| GRMZM2G152764                  | 18 | MEG | Low  | -         | -                                                                                    |
| GRMZM2G459363                  | 18 | MEG | Low  | -         | -                                                                                    |
| GRMZM2G447406                  | 18 | PEG | High | -         | Uncharacterized protein                                                              |
| GRMZM2G449489                  | 18 | PEG | High | -         | Uncharacterized protein                                                              |
| GRMZM2G007736                  | 18 | PEG | High | -         | Uncharacterized protein                                                              |
| GRMZM2G139406                  | 18 | PEG | High | -         | Uncharacterized protein                                                              |
| GRMZM2G048850                  | 18 | PEG | High | C2C2-GATA | Uncharacterized protein                                                              |
| GRMZM2G145123                  | 18 | PEG | High | -         | Putative RING/U-box superfamily protein; Uncharacterized protein                     |
| GRMZM2G104866                  | 18 | PEG | High | AP2-EREBP | Putative AP2/EREBP transcription factor superfamily protein; Uncharacterized protein |
| GRMZM2G121570                  | 18 | PEG | High | MYB       | MYB-type transcription factor                                                        |
| GRMZM2G084462                  | 18 | PEG | High | -         | Isopentenyl transferase IPT2                                                         |
| GRMZM2G037469                  | 18 | PEG | High | -         | Galactosylgalactosylxylosylprotein 3-beta-glucuronosyltransferase 1                  |
| GRMZM2G136465                  | 18 | PEG | High | -         | -                                                                                    |
| GRMZM2G164314                  | 18 | PEG | High | -         | -                                                                                    |
| GRMZM2G366435                  | 18 | PEG | High | -         | -                                                                                    |
| GRMZM2G479318                  | 18 | PEG | High | -         | -                                                                                    |
| GRMZM5G871454                  | 18 | PEG | High | -         | -                                                                                    |
| GRMZM2G156794                  | 18 | PEG | Low  | -         | Uncharacterized protein                                                              |
| GRMZM2G046686                  | 18 | PEG | Low  | -         | Hexokinase-1; Uncharacterized protein                                                |
| GRMZM2G131165                  | 18 | PEG | Low  | -         | Anthranilate N-benzoyltransferase protein 1                                          |
| GRMZM2G480434                  | 18 | PEG | Low  | AP2-EREBP | -                                                                                    |
| GRMZM2G311401                  | 18 | PEG | Low  | -         | -                                                                                    |
| GRMZM2G345189                  | 18 | PEG | Low  | -         | -                                                                                    |
| GRMZM2G474620                  | 18 | PEG | Low  | -         | -                                                                                    |

<sup>a</sup>Stringency of criteria used for defining imprinted/allele-biased gene expression patterns. High indicates genes identified by applying the relatively stringent criteria used by Xin et al. (2013); Low indicates additional genes identified by applying the less stringent criteria used in this study.

**Supplemental Table 9.** Motif analysis of the endosperm compartment-correlated modules M10, M12, M15, M17, and M18.

| Module | Motif | E-value   | Motif Sequence                    | Matching TF <sup>a</sup> |
|--------|-------|-----------|-----------------------------------|--------------------------|
| 10     | 1     | 1.30E-136 | [CG]CGCCGCCGCCG                   | abi4                     |
|        | 2     | 4.40E-62  | AAA[AT]AAA[AT]A[AT]A[AT]          | SOC1                     |
|        | 3     | 2.50E-56  | [GA][GA][AG]GAG[AG][AG][GA]GAG    | -                        |
|        | 4     | 2.20E-54  | CAGC[AG]GCAGC                     | -                        |
|        | 5     | 1.50E-41  | AA[AG]AAAAAAAAA                   | SOC1                     |
|        | 6     | 4.60E-39  | C[GT]CC[GAT]CC[GT]CC              | -                        |
|        | 7     | 2.70E-39  | [GC]C[GC][GC]CG[CG][CG][CG]GC[GC] | -                        |
|        | 8     | 2.40E-33  | [AT][AT]A[TA][TA]TAT[AT]T[AT][TA] | -                        |
|        | 9     | 5.10E-28  | GG[AG]GG[AG][GA]G[AG][AG]G[GA]    | -                        |
|        | 10    | 3.00E-25  | C[GC]TCG[TG]CG[CTG]C              | bZIP911                  |
| 12     | 1     | 7.70E-196 | CGCCGCCGCCGC                      | abi4                     |
|        | 2     | 4.10E-92  | CG[CG]CGCCGCC                     | abi4                     |
|        | 3     | 1.20E-76  | [GA][GA]AGAG[AG][GA]AGAG          | -                        |
|        | 4     | 9.30E-83  | AAAAAAAA[AT]A                     | SOC1                     |
|        | 5     | 2.10E-78  | C[TG]CCTCC[TG]CC[TG]C             | -                        |
|        | 6     | 4.30E-65  | [TA]A[TA]ATATA[TA][AT]TA          | -                        |
|        | 7     | 4.40E-55  | C[GC][GC]CG[GC]CGGC               | ERF1                     |
|        | 8     | 3.10E-53  | CG[TC]CGTCG[CT]C                  | -                        |
|        | 9     | 8.70E-51  | C[TC]GC[TC]GC[TG]GC               | -                        |
|        | 10    | 1.30E-37  | [AT]TTTT[AT]TTT                   | -                        |
| 15     | 1     | 7.00E-178 | CACTCGCAAAG                       | -                        |
|        | 2     | 7.10E-175 | GCCGCCGCCGCC                      | abi4                     |
|        | 3     | 4.30E-86  | GAGAG[AG][GA]AGA[GA][AG]          | -                        |
|        | 4     | 1.00E-68  | C[GC]GCG[GC]CG[GC]C               | ERF1                     |
|        | 5     | 3.00E-64  | AAAAA[AT]AAAA                     | SOC1                     |
|        | 6     | 2.70E-43  | G[CG][GC]G[CA]GG[CA][GC]G[CG]G    | abi4                     |
|        | 7     | 8.30E-48  | C[AG]GCAGC[AG]GC                  | -                        |
|        | 8     | 3.70E-46  | C[CT][CT]C[CT][CT]C[CT]CC[CT]C    | -                        |
|        | 9     | 9.60E-43  | [CT]C[GC][TCG]CG[CT]CG[GCT]CG     | -                        |
|        | 10    | 5.10E-30  | A[AT]A[TA]A[AT]A[TA][AT]AA[AT]    | -                        |
| 17     | 1     | 1.20E-154 | [GC][CG]CGCCGCCGCC                | abi4                     |
|        | 2     | 3.70E-88  | ATATA[TA]A[TA]A[TA]AT             | -                        |
|        | 3     | 1.50E-83  | A[AG]AAAAAAAAA                    | SOC1                     |
|        | 4     | 7.40E-97  | [AG]GAGA[GA][AG]GAGAG             | -                        |
|        | 5     | 7.30E-48  | CCGCCGCCGC                        | ERF1                     |
|        | 6     | 3.40E-50  | CG[CT]CG[TCG]CGCC                 | abi4                     |
|        | 7     | 3.10E-44  | AAA[AT][AT][AT]AA[TA]AAA          | SOC1                     |
|        | 8     | 6.40E-34  | CTCC[TG]CCTCC                     | -                        |
|        | 9     | 7.40E-34  | C[AG]GC[AG]GC[AG]GC               | -                        |
|        | 10    | 1.90E-37  | CC[GC]C[GC]C[GC]C[CG][GC][CG]C    | -                        |
| 18     | 1     | 1.80E-203 | [CG]CGCCGCCGCCG                   | abi4                     |
|        | 2     | 2.40E-182 | ATATATATATAT                      | -                        |
|        | 3     | 1.00E-174 | TAGATAGATAGA                      | --                       |
|        | 4     | 1.90E-101 | CACTCGCAAAG                       | --                       |
|        | 5     | 2.00E-99  | CG[CG]CGCCGCC                     | abi4                     |
|        | 6     | 9.20E-81  | TA[GA]ATATA[GA]A[TA]A             | -                        |
|        | 7     | 1.90E-81  | [AT]AAA[TA]AAA[TA]AAA             | SOC1                     |
|        | 8     | 1.80E-104 | TAGATA[GT]A[GT]A[GT]A             | --                       |
|        | 9     | 2.80E-115 | [GA]GAGAG[AG]GAGAG                | --                       |
|        | 10    | 1.40E-74  | C[GC]GCG[GC]CGGC                  | ERF1                     |

<sup>a</sup>Transcription factors of which the known binding motif most significantly matches the identified motif (q-value < 0.05).

**Supplemental Table 10.** Occurrences of sub-motifs of each motif enriched in upstream sequences of M18 genes as identified by MEME.

| Motif        | Sub-motifs   | Sites | Motif        | Sub-motifs    | Sites      | Motif        | Sub-motifs   | Sites |
|--------------|--------------|-------|--------------|---------------|------------|--------------|--------------|-------|
| 1            | CCGCCGCCGCCG | 63    | 5            | CGCCGCCGCC    | 65         | 8            | TAGATAGATAGA | 36    |
|              | GCGCCGCCGCCG | 18    |              | CGGCGCCGCC    | 32         |              | TAGATATAGATA | 31    |
|              | TCGCCGCCGCCG | 13    |              | CGCCGCCGGC    | 3          |              | TAGATAGAGATA | 10    |
|              | CCGCCGCCGCC  | 3     | 6            | TAGATATAGATA  | 24         |              | TAGAGAGAGAGA | 8     |
|              | GCGCCGCCGCC  | 3     |              | TAGATATATATA  | 13         |              | TAGATATAGAGA | 7     |
| 2            | ATATATATATAT | 90    |              | TAAATATAAATA  | 11         |              | TAGATAGATATA | 6     |
|              | ATATATATAGAT | 10    |              | TAGATATAGAAA  | 10         |              | AAGATAGAGAGA | 1     |
| 3            | TAGATAGATAGA | 72    |              | TAGATATAAATA  | 8          |              | TAGATAGAGAGA | 1     |
|              | TAGATATATAGA | 18    | TAAATATAAAAA | 7             | 9          |              | AGAGAGAGAGAG | 40    |
|              | TAGATAAATAGA | 10    | TAAATATATAAA | 6             |            |              | GGAGAGAGAGAG | 21    |
| 4            | CACTCGGCAAAG | 45    | TATATATATATA | 6             |            | AGAGAGGGAGAG | 6            |       |
|              | CACTCGACAAAG | 4     | TAAATATATATA | 4             |            | GGAGAGGGAGAG | 6            |       |
|              | CACTCGGCACAG | 3     | TAGATAAAAAAA | 4             |            | GGAGGAGGAGAG | 6            |       |
|              | CACTCGGTAAAG | 3     | TAAATATAGAAA | 3             |            | GGAGAAGGAGAA | 4            |       |
|              | CTCTCGGCAAAG | 3     | TAGATATATAAA | 3             |            | GGAGAAGGAGAG | 4            |       |
|              | CTCTCGGCACAG | 3     | TAGATATAAAAA | 1             |            | GGAGAGAGAGAA | 3            |       |
|              | CACCCGGCAAAG | 2     | 7            | AAAATAAATAAA  |            | 23           | GGAGAAAGAGAG | 2     |
|              | CACTCAGCAAAG | 2     |              | AAAATAAAAAAA  |            | 12           | GGAGGGAGAGAG | 2     |
|              | CACTCGGCAAAA | 2     |              | AAAAAAAAAAAAA | 11         | GGAGGGAGAGGG | 2            |       |
|              | CACTCGGCAAAC | 2     |              | TAAAAAATAAA   | 10         | GGAGAGAGAGGG | 1            |       |
|              | CACTCGGCAAAT | 2     |              | AAAAAAAATAAA  | 8          | GGAGAGGGAGGG | 1            |       |
|              | CACTTGGCAAAG | 2     |              | TAAATAAATAAA  | 8          | GGAGGGGGAGAG | 1            |       |
|              | CGCTCGGCAAAG | 2     |              | TAGAAAAATAAA  | 7          | GGAGGGGGAGGG | 1            |       |
|              | CTCTCGACAAAG | 2     |              | AAGAAAAATAAA  | 5          | 10           | CGGCGGCGGC   | 40    |
|              | TACTCGGCAAAG | 2     |              | TAAAAAATAAA   | 4          |              | CGGCGCCGGC   | 31    |
|              | AACTCGGCAAAG | 1     |              | TAAATAAAAAAA  | 4          |              | CCGCGGCGGC   | 26    |
|              | CACTCGGCGAAG | 1     | AATATAAATAAA | 3             | CGGCGGCGCC |              | 3            |       |
|              | CACTCGGTACAG | 1     | AAGATAAATAAA | 2             |            |              |              |       |
|              | CATTCGGCAAAG | 1     | TATATAAATAAA | 2             |            |              |              |       |
|              | CCCTCGGCAAAG | 1     | AAAATATATAAA | 1             |            |              |              |       |
| CTCTCAGCAAAG | 1            |       |              |               |            |              |              |       |

**Supplemental Table 11.** Putative functions of the 93 M18 genes that contain at least one MRP-1-binding sub-motifs (Motifs 3a/8a, 6a/8b, 8c, and 8f).

| Gene ID          | MM          | TF Family   | Locus/<br>TF Name | Functional Annotation                                                                                |
|------------------|-------------|-------------|-------------------|------------------------------------------------------------------------------------------------------|
| AC196417.3_FG008 | 0.997666935 | -           | -                 | -                                                                                                    |
| AC204876.3_FG006 | 0.995274098 | -           | -                 | -                                                                                                    |
| AC233883.1_FG006 | 0.98545352  | -           | -                 | Uncharacterized protein                                                                              |
| GRMZM2G002903    | 0.980405318 | -           | -                 | Uncharacterized protein                                                                              |
| GRMZM2G003493    | 0.709293417 | -           | -                 | Uncharacterized protein                                                                              |
| GRMZM2G005710    | 0.925096716 | -           | -                 | Uncharacterized protein                                                                              |
| GRMZM2G007784    | 0.97271802  | -           | -                 | -                                                                                                    |
| GRMZM2G008271    | 0.998357469 | -           | BAP-1A            | Basal layer antifungal peptide                                                                       |
| GRMZM2G008403    | 0.997103295 | -           | BAP-1B            | Basal layer antifungal peptide                                                                       |
| GRMZM2G009427    | 0.995625792 | -           | -                 | -                                                                                                    |
| GRMZM2G010762    | 0.994304527 | -           | -                 | Early nodulin-like protein 3                                                                         |
| GRMZM2G011896    | 0.988628322 | -           | -                 | Putative leucine-rich repeat receptor-like protein kinase family protein;<br>Uncharacterized protein |
| GRMZM2G017869    | 0.995815117 | -           | -                 | Uncharacterized protein                                                                              |
| GRMZM2G024350    | 0.995946537 | -           | -                 | Uncharacterized protein                                                                              |
| GRMZM2G027472    | 0.995775449 | -           | -                 | Uncharacterized protein                                                                              |
| GRMZM2G028386    | 0.995641682 | AP2-EREBP   | EREB137           | -                                                                                                    |
| GRMZM2G034862    | 0.995837595 | -           | -                 | Uncharacterized protein                                                                              |
| GRMZM2G045082    | 0.995397205 | -           | -                 | Putative uncharacterized protein                                                                     |
| GRMZM2G045638    | 0.978759996 | -           | -                 | Uncharacterized protein                                                                              |
| GRMZM2G047833    | 0.995274098 | -           | -                 | -                                                                                                    |
| GRMZM2G048850    | 0.697116411 | C2C2-GATA   | GATA33            | Uncharacterized protein                                                                              |
| GRMZM2G049695    | 0.930118941 | MYB-related | MYBR24            | Putative MYB DNA-binding domain superfamily protein                                                  |
| GRMZM2G049912    | 0.950990813 | -           | -                 | Uncharacterized protein                                                                              |
| GRMZM2G050407    | 0.966973351 | -           | -                 | Uncharacterized protein                                                                              |
| GRMZM2G054359    | 0.996226267 | -           | -                 | Uncharacterized protein                                                                              |
| GRMZM2G054632    | 0.977265787 | -           | -                 | Uncharacterized protein                                                                              |
| GRMZM2G058703    | 0.998757072 | -           | -                 | Uncharacterized protein                                                                              |
| GRMZM2G060991    | 0.984451944 | -           | -                 | -                                                                                                    |
| GRMZM2G066546    | 0.982044708 | -           | -                 | Uncharacterized protein                                                                              |
| GRMZM2G076370    | 0.997249693 | -           | -                 | Uncharacterized protein                                                                              |
| GRMZM2G079547    | 0.994976509 | -           | -                 | Uncharacterized protein                                                                              |
| GRMZM2G082785    | 0.991592203 | -           | BETL-1            | BET1 protein                                                                                         |
| GRMZM2G082799    | 0.978839534 | -           | -                 | BET1 protein                                                                                         |
| GRMZM2G086827    | 0.998053357 | -           | MEG-10            | -                                                                                                    |
| GRMZM2G086835    | 0.923876737 | -           | -                 | Zinc finger protein 7                                                                                |
| GRMZM2G088896    | 0.998693431 | -           | MEG-9             | -                                                                                                    |
| GRMZM2G091445    | 0.999221086 | -           | BETL-10           | Putative defensin                                                                                    |
| GRMZM2G094054    | 0.997047242 | -           | MEG-6             | Putative uncharacterized protein                                                                     |
| GRMZM2G095337    | 0.885645943 | -           | -                 | Uncharacterized protein                                                                              |
| GRMZM2G103526    | 0.7672607   | -           | -                 | Acid phosphatase 1; Uncharacterized protein                                                          |
| GRMZM2G106655    | 0.99900411  | -           | -                 | -                                                                                                    |
| GRMZM2G107302    | 0.999258566 | -           | -                 | Uncharacterized protein                                                                              |
| GRMZM2G107754    | 0.99443088  | -           | -                 | Uncharacterized protein                                                                              |
| GRMZM2G110395    | 0.833343634 | -           | -                 | -                                                                                                    |
| GRMZM2G110816    | 0.987045749 | -           | -                 | Uncharacterized protein                                                                              |
| GRMZM2G115574    | 0.993363479 | -           | -                 | Uncharacterized protein                                                                              |
| GRMZM2G128531    | 0.995574221 | -           | -                 | Blue copper protein                                                                                  |
| GRMZM2G131982    | 0.99682921  | DBB         | -                 | -                                                                                                    |



| Supplemental Table 11 Continued |             |             |        |                                                                            |
|---------------------------------|-------------|-------------|--------|----------------------------------------------------------------------------|
| GRMZM2G118214                   | 0.789535171 | C2C2-GATA   | GATA7  | Putative GATA transcription factor family protein; Uncharacterized protein |
| GRMZM2G122437                   | 0.970709069 | -           | -      | Uncharacterized protein                                                    |
| GRMZM2G126055                   | 0.972985678 | -           | -      | Putative cytochrome P450 superfamily protein; Uncharacterized protein      |
| GRMZM2G133370                   | 0.998120923 | -           | BAP-3B | Basal layer antifungal peptide                                             |
| GRMZM2G133382                   | 0.996008427 | -           | BAP-3A | Basal layer antifungal peptide                                             |
| GRMZM2G133407                   | 0.966870998 | -           | -      | Uncharacterized protein                                                    |
| GRMZM2G136771                   | 0.995682732 | -           | -      | Uncharacterized protein                                                    |
| GRMZM2G137959                   | 0.998934848 | -           | MEG-4  | MEG4                                                                       |
| GRMZM2G141574                   | 0.950302131 | -           | -      | -                                                                          |
| GRMZM2G147226                   | 0.968661535 | -           | -      | Uncharacterized protein                                                    |
| GRMZM2G148270                   | 0.984627461 | -           | -      | Putative uncharacterized protein                                           |
| GRMZM2G152655                   | 0.999157709 | -           | BAP-2  | Basal layer antifungal protein2; Uncharacterized protein                   |
| GRMZM2G156794                   | 0.995986927 | -           | -      | Uncharacterized protein                                                    |
| GRMZM2G158400                   | 0.997452659 | -           | -      | Uncharacterized protein                                                    |
| GRMZM2G158407                   | 0.999145715 | -           | -      | -                                                                          |
| GRMZM2G165535                   | 0.986253278 | -           | -      | Uncharacterized protein                                                    |
| GRMZM2G170181                   | 0.695195223 | -           | -      | -                                                                          |
| GRMZM2G172596                   | 0.998045775 | -           | -      | GAST1 protein                                                              |
| GRMZM2G175250                   | 0.994699115 | -           | -      | Putative cytochrome P450 superfamily protein                               |
| GRMZM2G175896                   | 0.997778567 | -           | MEG-12 | -                                                                          |
| GRMZM2G175912                   | 0.999396321 | -           | MEG-13 | -                                                                          |
| GRMZM2G181051                   | 0.998899063 | -           | MEG-11 | -                                                                          |
| GRMZM2G332483                   | 0.99739216  | -           | -      | Uncharacterized protein                                                    |
| GRMZM2G332703                   | 0.983249958 | -           | -      | -                                                                          |
| GRMZM2G341010                   | 0.998049519 | -           | -      | Uncharacterized protein                                                    |
| GRMZM2G342246                   | 0.99535502  | -           | -      | Beta-expansin 7                                                            |
| GRMZM2G347956                   | 0.843165264 | -           | -      | Plastid-specific 30S ribosomal protein 1                                   |
| GRMZM2G354335                   | 0.998651579 | -           | MEG-1  | Putative uncharacterized protein                                           |
| GRMZM2G383937                   | 0.995865784 | -           | -      | -                                                                          |
| GRMZM2G406552                   | 0.791376554 | -           | -      | Nonspecific lipid-transfer protein                                         |
| GRMZM2G409309                   | 0.996479121 | -           | -      | -                                                                          |
| GRMZM2G422083                   | 0.995972492 | MYB-related | MYBR33 | Putative MYB DNA-binding domain superfamily protein                        |
| GRMZM2G426158                   | 0.995470482 | -           | -      | -                                                                          |
| GRMZM2G466545                   | 0.964270672 | -           | -      | Uncharacterized protein                                                    |
| GRMZM2G487702                   | 0.993630476 | -           | -      | -                                                                          |
| GRMZM2G502035                   | 0.998543642 | -           | MEG-2  | MEG2; Maternally expressed gene 2; Uncharacterized protein                 |
| GRMZM5G800473                   | 0.996024857 | -           | -      | -                                                                          |
| GRMZM5G802585                   | 0.808982972 | -           | -      | Uncharacterized protein                                                    |
| GRMZM5G803611                   | 0.922753269 | -           | -      | Uncharacterized protein                                                    |
| GRMZM5G812796                   | 0.999152    | -           | -      | Uncharacterized protein                                                    |
| GRMZM5G836886                   | 0.93249873  | -           | -      | -                                                                          |
| GRMZM5G864689                   | 0.623012716 | -           | -      | Uncharacterized protein                                                    |
| GRMZM5G888860                   | 0.957073782 | -           | -      | -                                                                          |
| GRMZM5G890815                   | 0.954454282 | -           | -      | -                                                                          |
| GRMZM5G897740                   | 0.998634244 | -           | -      | Uncharacterized protein                                                    |

**Supplemental Table 12.** Results of Y1H assays for binding of MRP-1 to the promoters of genes within M18.

| Gene ID          | Locus/TF Name | Sub-motifs Contained in Promoter <sup>a</sup> | Y1H Results <sup>b</sup> |
|------------------|---------------|-----------------------------------------------|--------------------------|
| AC184794.2_FG003 | -             | None                                          | -                        |
| GRMZM2G009854    | -             | None                                          | +                        |
| GRMZM2G016145    | TCRR-1        | None                                          | (+)                      |
| GRMZM2G027472    | -             | 3a/8a (3), 6a/8b (2), 8c (1), 8f (1)          | +                        |
| GRMZM2G030403    | MYBR9         | None                                          | -                        |
| GRMZM2G034862    | -             | 3a/8a (1), 8f (1)                             | +                        |
| GRMZM2G054359    | -             | 3a/8a (5), 6a/8b (1), 8f (3)                  | +                        |
| GRMZM2G055621    | -             | None                                          | -                        |
| GRMZM2G058703    | -             | 3a/8a (2)                                     | +                        |
| GRMZM2G062565    | -             | None                                          | +                        |
| GRMZM2G063042    | -             | None                                          | +                        |
| GRMZM2G070399    | -             | None                                          | -                        |
| GRMZM2G072219    | -             | None                                          | -                        |
| GRMZM2G082799    | -             | 6a/8b (1), 8c (1)                             | +                        |
| GRMZM2G084462    | -             | None                                          | -                        |
| GRMZM2G087413    | -             | None                                          | +                        |
| GRMZM2G091445    | -             | 6a/8b (1)                                     | +                        |
| GRMZM2G107302    | -             | 3a/8a (6)                                     | +                        |
| GRMZM2G111306    | MRP-1         | None                                          | -                        |
| GRMZM2G112925    | -             | None                                          | -                        |
| GRMZM2G121111    | MYBR81        | None                                          | -                        |
| GRMZM2G123411    | -             | None                                          | +                        |
| GRMZM2G125386    | -             | None                                          | -                        |
| GRMZM2G133370    | -             | 3a/8a (1), 6a/8b (1), 8c (1)                  | +                        |
| GRMZM2G133382    | -             | 3a/8a (5), 8c (1)                             | +                        |
| GRMZM2G136771    | -             | 3a/8a (5), 6a/8b (1)                          | +                        |
| GRMZM2G138392    | -             | None                                          | (+)                      |
| GRMZM2G141574    | -             | 6a/8b (2), 8f (1)                             | +                        |
| GRMZM2G152655    | BETL-2        | 3a/8a (4), 8c                                 | +                        |
| GRMZM2G158407    | -             | 3a/8a (2)                                     | +                        |
| GRMZM2G175912    | -             | 6a/8b (3)                                     | (+)                      |
| GRMZM2G175976    | BETL-3        | None                                          | -                        |
| GRMZM2G181051    | -             | 8f (1)                                        | +                        |
| GRMZM2G332483    | -             | 3a/8a (1), 8c (1), 8f (1)                     | +                        |
| GRMZM2G354335    | MEG-1         | 6a/8b (2), 8f (1)                             | +                        |
| GRMZM2G386276    | -             | None                                          | -                        |
| GRMZM2G402156    | MYBR19        | None                                          | -                        |
| GRMZM2G422083    | MYBR33        | 6a/8b (2)                                     | +                        |
| GRMZM2G426158    | -             | 3a/8a (2)                                     | +                        |
| GRMZM5G800473    | -             | 6a/8b (1)                                     | +                        |
| GRMZM5G812796    | -             | 6a/8b (1)                                     | +                        |
| GRMZM5G897740    | -             | 8f (1)                                        | +                        |

<sup>a</sup>The number in parenthesis indicates the number of copies of that sub-motif.

<sup>b</sup>Scoring: + indicates strong positive, (+) indicates weak positive, - indicates negative. Images of the Y1H growth assays are shown in Supplemental Figure 16.

**Supplemental Table 13.** Sequences of the primers used to generate the clones for the *in situ* hybridization probes.

| Gene ID       | Forward Primer       | Reverse Primer        |
|---------------|----------------------|-----------------------|
| GRMZM2G008271 | TCTAGTTCATCACCCATGGC | GATCATGCATTAAGAGGGTC  |
| GRMZM2G058703 | CACATTGTTAGTATTAGACC | TAAAGCAGGAAGGGGAGAGG  |
| GRMZM2G087413 | TAAAGATCTCAGTGTACAC  | AGCCAGGTTGAAACGGCCTC  |
| GRMZM2G089713 | TACATTCTGGATCAGGTCCG | CCCTTCAACTTGTACTCGTC  |
| GRMZM2G091774 | GGAGGCCTCCTCAAGATTGG | AGCATAATAGCATCAGTTGG  |
| GRMZM2G107302 | AGTACACGACTCAGCCATTG | GACACCAAATACTATATGC   |
| GRMZM2G121137 | TATCAGTATCTTCCACAAGC | CAAAACACCAACACAAATGC  |
| GRMZM2G123411 | CTCTAAACTCAAACAAATAC | CGAGTGCTTCAGACACTCGG  |
| GRMZM2G132162 | AGCATACTATTAGACATACC | GAGGCCACGTATGGAGAACC  |
| GRMZM2G133370 | GATCTTATCCATCACCTATG | CTAATATCATTGAAGACACAC |
| GRMZM2G149869 | CGCCGACGCAAGACTACCAG | ACCTAACACCTGATGAATCC  |
| GRMZM2G158400 | GGAGAAGAAATTACAGATCC | TAGTAAAGATTTATGAGCAC  |
| GRMZM2G158407 | GAACATCGAAAGTATCATGC | AACAGTTTTGTTTCATATCTC |
| GRMZM2G170400 | AAAGCTTGTGGGAAAATGG  | GTGAAGGATGGTGTACGGC   |
| GRMZM2G175912 | CATGTACAAAATGATATCGG | TGACTAAATTTGCGAATCG   |
| GRMZM2G332483 | CAAGATCAGCCCCAAGCACG | ACTTATCTTATTGAGTTCAC  |
| GRMZM2G426158 | ATAGGCAATGTAAGAGTAGC | TTGAGACTGTTTCGAGATAG  |
| GRMZM2G429899 | GGCTACACAAATGCCTGAAG | ACATCCAGAGCTGACACGTG  |
| GRMZM2G437435 | TGGATGCTACACTCCTATCG | ATGGCTCCTCGTTGCTCAGC  |
| GRMZM5G812796 | CGATCGTCGTGCGAGAAAGG | GAAATACTCCACATGCATTG  |

**Supplemental Table 14.** Sequences of the primers used to generate the constructs to test the sub-motifs in Y1H assays. The sub-motif sequences are in bold red letters and are underlined. In all constructs, the sequence of the reverse primer was GATCCTCGAGGGACTAGCTAGACAAGCTCTC.

| Sub-motif | Forward Primer                                         |
|-----------|--------------------------------------------------------|
| 3a/8a     | GATCAAGCTT <b><u>TAGATAGATAGA</u></b> TTAAGCGTATCGCTAG |
| 3b        | GATCAAGCTT <b><u>TAGATATATAGA</u></b> TTAAGCGTATCGCTAG |
| 3c        | GATCAAGCTT <b><u>TAGATAAATAGA</u></b> TTAAGCGTATCGCTAG |
| 6a/8b     | GATCAAGCTT <b><u>TAGATATAGATA</u></b> TTAAGCGTATCGCTAG |
| 6b        | GATCAAGCTT <b><u>TAGATATATATA</u></b> TTAAGCGTATCGCTAG |
| 6c        | GATCAAGCTT <b><u>TAAATATAAATA</u></b> TTAAGCGTATCGCTAG |
| 6d        | GATCAAGCTT <b><u>TAGATATAGAAA</u></b> TTAAGCGTATCGCTAG |
| 6e        | GATCAAGCTT <b><u>TAGATATAAATA</u></b> TTAAGCGTATCGCTAG |
| 6f        | GATCAAGCTT <b><u>TAAATATAAAAA</u></b> TTAAGCGTATCGCTAG |
| 6g        | GATCAAGCTT <b><u>TAAATATATAAA</u></b> TTAAGCGTATCGCTAG |
| 6h        | GATCAAGCTT <b><u>TATATATATATA</u></b> TTAAGCGTATCGCTAG |
| 6i        | GATCAAGCTT <b><u>TAAATATATATA</u></b> TTAAGCGTATCGCTAG |
| 6j        | GATCAAGCTT <b><u>TAGATAAAAAAA</u></b> TTAAGCGTATCGCTAG |
| 6k        | GATCAAGCTT <b><u>TAAATATAGAAA</u></b> TTAAGCGTATCGCTAG |
| 6l        | GATCAAGCTT <b><u>TAGATATATAAA</u></b> TTAAGCGTATCGCTAG |
| 6m        | GATCAAGCTT <b><u>TAGATATAAAAA</u></b> TTAAGCGTATCGCTAG |
| 8c        | GATCAAGCTT <b><u>TAGATAGAGATA</u></b> TTAAGCGTATCGCTAG |
| 8d        | GATCAAGCTT <b><u>TAGAGAGAGAGA</u></b> TTAAGCGTATCGCTAG |
| 8e        | GATCAAGCTT <b><u>TAGATATAGAGA</u></b> TTAAGCGTATCGCTAG |
| 8f        | GATCAAGCTT <b><u>TAGATAGATATA</u></b> TTAAGCGTATCGCTAG |
| 8g        | GATCAAGCTT <b><u>AAGATAGAGAGA</u></b> TTAAGCGTATCGCTAG |
| 8h        | GATCAAGCTT <b><u>TAGATAGAGAGA</u></b> TTAAGCGTATCGCTAG |

**Supplemental Table 15.** Sequences of the primers used to generate the constructs to test the promoters in Y1H assays.

| Gene ID          | Forward Primer                         | Reverse Primer                            |
|------------------|----------------------------------------|-------------------------------------------|
| AC184794.2_FG003 | GATCAAGCTTGTCTAGAATGGTTTAGTGTAG        | GATCCTCGAGGCACTTTCCGCAGATCCC<br>ATATG     |
| GRMZM2G009854    | GATCAAGCTTCAGCTACACCTGAAA<br>ACCTAAAC  | GATCCTCGAGCTTTTTGATGATTTAGCAG<br>GTGG     |
| GRMZM2G016145    | GATCAAGCTTCGTCTACTTCTTGCT<br>CTAGATC   | GATCCTCGAGGGACTAGCTAGACAAGCT<br>CTC       |
| GRMZM2G027472    | GATCGGTACCATGGTGTGGAACGA<br>CCGTTG     | GATCCTCGAGATGGATGACCGATAAGAG<br>C         |
| GRMZM2G030403    | GATCAAGCTTGAATAGTGGTATGAA<br>CTATGC    | GATCCTCGAGGAGAGTTGAGGATTGAGT<br>AC        |
| GRMZM2G034862    | GATCAAGCTTGGCCTCTAACGTAAT<br>GGTTAAGG  | GATCCTCGAGGGGTGATTAGAAAATACT<br>AATGCC    |
| GRMZM2G046532    | GATCAAGCTTGGCATGTACATAGGG<br>CTCTG     | GATCCTCGAGTATTCTATCCTTTGAGATG<br>GAATG    |
| GRMZM2G054359    | GATCAAGCTTGGTGTGGTTAGTCA<br>CAAGTC     | GATCCTCGAGGGGTGCTAGATGAGAGCT<br>AATACC    |
| GRMZM2G055621    | GATCAAGCTTGATGGGGAGAGGCA<br>TGTAAC     | GATCCTCGAGGTCGTATGAACAGGAGTG<br>C         |
| GRMZM2G058703    | GATCAAGCTTATCAGGATACAATCG<br>TTCTG     | GATCCTCGAGGGGTGATGAACTAGAAAG<br>TG        |
| GRMZM2G062565    | GATCGGTACCGGTTTGTGCTGAACC<br>TTTGG     | GATCCTCGAGGGACAGTGAGTGACCTAA<br>CTATG     |
| GRMZM2G063042    | GATCGGTACCGACCGAAGGGGAAA<br>AAGAC      | GATCCTCGAGGGTTTGTATATTTGCTA<br>G          |
| GRMZM2G070399    | GATCAAGCTTCATGGGTTGCACGTG<br>AAC       | GATCCTCGAGCGACGATCTACACTGCTG<br>TC        |
| GRMZM2G072219    | GATCAAGCTTCTATCTTCTACATTCT<br>TTGCC    | GATCCTCGAGTTTGTAGTGCTATATGTGG<br>ATTGG    |
| GRMZM2G082799    | GATCAAGCTTCCTTTTCTTATACCA<br>CATGCC    | GATCCTCGAGAAGGAAAGATGATCAAGC<br>TTC       |
| GRMZM2G084462    | GATCAAGCTTGGATCGATGACGTGA<br>TCAAG     | GATCCTCGAGGTCTTGATGATCTTGATTA<br>TTGTAGCC |
| GRMZM2G087413    | GATCAAGCTTGGGATTTTGTAGGAA<br>TCATC     | GATCCTCGAGGGGTATAACTTCAACTGTT<br>G        |
| GRMZM2G091445    | GATCAAGCTTACCACTGCTTGCTAG<br>TGATTTT   | GATCCTCGAGTGAGGAGAACAGCATAACA<br>CATG     |
| GRMZM2G107302    | GATCAAGCTTGTAGTTCAGCAGAAA<br>ACAGCACGC | GATCCTCGAGCGAGCGTGTACTGCACGC<br>ACAT      |
| GRMZM2G111306    | GATCAAGCTTATATCACAAGGAAAG<br>ATATG     | GATCCTCGAGGAGGTGCCGAGGGATTAAG<br>TAC      |
| GRMZM2G112925    | GATCAAGCTTGCCTTTACGGGCTTT<br>TTAGG     | GATCCTCGAGGTTTCTTGGGCTTTGG                |
| GRMZM2G115340    | GATCGGTACCAAAAGAGGTGGGAT<br>CACCC      | GATCCTCGAGCCATCAGCAACTAACGTT<br>TC        |
| GRMZM2G121111    | GATCAAGCTTAGAGGAGCGGTTGAA<br>CACTG     | GATCCTCGAGCGGCCGGGGTTAGCTAA<br>GCTAG      |
| GRMZM2G123411    | GATCAAGCTTGCCCGTCTGTCTA<br>CAACG       | GATCCTCGAGGGGTGAAAAGGGTAAGAG<br>C         |
| GRMZM2G125386    | GATCAAGCTTCTTGGTTTTGGTAA<br>TTGTGCC    | GATCCTCGAGAGAGGAAACAATTGTTCTT<br>GC       |
| GRMZM2G133370    | GATCGGTACCGCGGTTGGTAGACA<br>GGTAGG     | GATCCTCGAGAGGTGATGGATAAGATCT<br>AATA      |



| Supplemental Table 15 Continued |                                       |                                        |
|---------------------------------|---------------------------------------|----------------------------------------|
| GRMZM2G133382                   | GATCAAGCTTCTCGAATAATCTAATG<br>TATTC   | GATCCTCGAGTGTGATGGATAAGAGCTA<br>ATAATA |
| GRMZM2G136771                   | GATCAAGCTTAAAGCAATGCTCATC<br>TTTAACC  | GATCCTCGAGGTGAAATGAAGAGGAGTG<br>G      |
| GRMZM2G138392                   | GATCAAGCTTCGGTTTTGAATGTGC             | GATCCTCGAGGTCAGACACGATGAGAGA<br>G      |
| GRMZM2G141574                   | GATCAAGCTTATGCACTTTGGATATA<br>CC      | GATCCTCGAGAAGAAGAGGATATATAGA<br>TC     |
| GRMZM2G150680                   | GATCGGTACCCGTGGGTTTTCGTACC<br>CAC     | GATCCTCGAGATCAGCACAAAGATCCAAG<br>G     |
| GRMZM2G152655                   | GGCCGGTACCAGTTGATATAACTAG<br>ATAGG    | GATCCTCGAGGGGTGACAGATGATATGA<br>GC     |
| GRMZM2G158407                   | GATCAAGCTT<br>CTGTCTCGGATGGAAAAAC     | GATCCTCGAGGGTTAATTATTTGGGTGA<br>GGA    |
| GRMZM2G175912                   | GATCGGTACCACGGTTAATAGTAGA<br>GCCAG    | GCCCTCGAGGACGCAAGAAAATCTAAAG<br>AAC    |
| GRMZM2G175976                   | GATCAAGCTTCAAATTACCCGCAGG<br>GGTATG   | GATCCTCGAGTGTAGTTTGCTATCACCC<br>T      |
| GRMZM2G181051                   | GATCAAGCTTAACTTCTGCAGAGTG<br>TTTTG    | GATCCTCGAGGTCGCAAGAAAATTTAAG<br>GAAC   |
| GRMZM2G314094                   | GATCAAGCTTCGAGAGCCTAACTTC<br>ACCCAAC  | GATCCTCGAGCACAAATTAATGCATAGA<br>AG     |
| GRMZM2G332483                   | GATCGGTACCATACATAGATGGACA<br>AACTG    | GATCCTCGAGGAGATGAGAGCACAAAT<br>TAC     |
| GRMZM2G354335                   | GGCCGGTACCTCTCGACACAGGTA<br>GGTAG     | GATCCTCGAGGTCGCAAGAAATGTTAAG<br>GAAC   |
| GRMZM2G386276                   | GATCCCCGGGGTAGGAACTCACATA<br>AG       | GATCCTCGAGCTTTAAGTTAAATATGGTA<br>CC    |
| GRMZM2G402156                   | GATCAAGCTTGCCCTGGACGGTTTCG<br>CGATTAG | GATCCTCGAGGGGGTTGGGTACTACGAT<br>ATATG  |
| GRMZM2G422083                   | GATCAAGCTTCCATACAGATATAGG<br>TATATG   | GATCCTCGAGACATGGATGGAGAAAAG<br>GC      |
| GRMZM2G426158                   | GATCAAGCTTCGAGCCTTCGCATCG<br>TTGATC   | GATCCTCGAGGGTCGTATGAACAGGAGT<br>GCTAG  |
| GRMZM2G846314                   | GATCAAGCTTCGAAAGGACAGGA<br>CGTGTG     | GATCCTCGAGGATGCAACAAATACCTCC<br>TAC    |
| GRMZM5G800473                   | GATCAAGCTTCGAGCGAGCCGGAA<br>GTTTG     | GATCCTCGAGATTGGAATGTATGTGAGT<br>GAG    |
| GRMZM5G812796                   | GATCAAGCTTCTTCTGACCATTGGC<br>TCTG     | GATCCTCGAGGAGGAAACGAGTATTCTT<br>GC     |
| GRMZM5G897740                   | GATCAAGCTTCAAGTTTCATACCAAT<br>ATACG   | GATCCTCGAGCGCCACCACTTCTTCTCT<br>G      |

## Supplemental References

- Balandín, M., Royo, J., Gómez, E., Muniz, L.M., Molina, A., and Hueros, G.** (2005). A protective role for the embryo surrounding region of the maize endosperm, as evidenced by the characterisation of ZmESR-6, a defensin gene specifically expressed in this region. *Plant molecular biology* **58**, 269-282.
- Chen, J., Zeng, B., Zhang, M., Xie, S., Wang, G., Hauck, A., and Lai, J.** (2014). Dynamic transcriptome landscape of maize embryo and endosperm development. *Plant physiology* **166**, 252-264.
- Gómez, E., Royo, J., Guo, Y., Thompson, R., and Hueros, G.** (2002). Establishment of Cereal Endosperm Expression Domains Identification and Properties of a Maize Transfer Cell-Specific Transcription Factor, ZmMRP-1. *The Plant cell* **14**, 599-610.
- Gómez, E., Royo, J., Muñoz, L.M., Sellam, O., Paul, W., Gerentes, D., Barrero, C., López, M., Perez, P., and Hueros, G.** (2009). The maize transcription factor myb-related protein-1 is a key regulator of the differentiation of transfer cells. *The Plant cell* **21**, 2022-2035.
- Gutiérrez-Marcos, J.F., Costa, L.M., Biderre-Petit, C., Khbaya, B., O'Sullivan, D.M., Wormald, M., Perez, P., and Dickinson, H.G.** (2004). maternally expressed gene1 is a novel maize endosperm transfer cell-specific gene with a maternal parent-of-origin pattern of expression. *The Plant cell* **16**, 1288-1301.
- Hueros, G., Varotto, S., Salamini, F., and Thompson, R.D.** (1995). Molecular characterization of BET1, a gene expressed in the endosperm transfer cells of maize. *The Plant cell* **7**, 747-757.
- Hueros, G., Royo, J., Maitz, M., Salamini, F., and Thompson, R.D.** (1999). Evidence for factors regulating transfer cell-specific expression in maize endosperm. *Plant molecular biology* **41**, 403-414.
- Li, G., Wang, D., Yang, R., Logan, K., Chen, H., Zhang, S., Skaggs, M.I., Lloyd, A., Burnett, W.J., Laurie, J.D., Hunter, B.G., Dannenhoffer, J.M., Larkins, B.A., Drews, G.N., Wang, X., and Yadegari, R.** (2014). Temporal patterns of gene expression in developing maize endosperm identified through transcriptome sequencing. *Proceedings of the National Academy of Sciences of the United States of America* **111**, 7582-7587.
- Magnard, J.-L., Le Deunff, E., Domenech, J., Rogowsky, P.M., Testillano, P.S., Rougier, M., Risueño, M.C., Vergne, P., and Dumas, C.** (2000). Genes normally expressed in the endosperm are expressed at early stages of microspore embryogenesis in maize. *Plant molecular biology* **44**, 559-574.
- Magnard, J.L., Lehouque, G., Massonneau, A.E., Frangne, N., Heckel, T., Gutierrez-Marcos, J.F., Perez, P., Dumas, C., and Rogowsky, P.M.** (2003). ZmEBE genes show a novel, continuous expression pattern in the central cell before fertilization and in specific domains of the resulting endosperm after fertilization. *Plant molecular biology* **53**, 821-836.
- Massonneau, A., Condamine, P., Wisniewski, J.-P., Zivy, M., and Rogowsky, P.M.** (2005). Maize cystatins respond to developmental cues, cold stress and drought. *Biochimica et Biophysica Acta (BBA)-Gene Structure and Expression* **1729**, 186-199.
- Muniz, L.M., Royo, J., Gomez, E., Baudot, G., Paul, W., and Hueros, G.** (2010). Atypical response regulators expressed in the maize endosperm transfer cells link canonical two component systems and seed biology. *BMC plant biology* **10**, 84.

- Muñiz, L.M., Royo, J., Gómez, E., Barrero, C., Bergareche, D., and Hueros, G.** (2006). The maize transfer cell specific type-A response regulator ZmTCRR-1 appears to be involved in intercellular signalling. *The Plant Journal* **48**, 17-27.
- Royo, J., Gomez, E., Sellam, O., Gerentes, D., Paul, W., and Hueros, G.** (2014). Two maize END-1 orthologs, BETL9 and BETL9like, are transcribed in a non-overlapping spatial pattern on the outer surface of the developing endosperm. *Frontiers in plant science* **5**, 180.
- Serna, A., Maitz, M., O'Connell, T., Santandrea, G., Thevissen, K., Tienens, K., Hueros, G., Faleri, C., Cai, G., and Lottspeich, F.** (2001). Maize endosperm secretes a novel antifungal protein into adjacent maternal tissue. *The Plant Journal* **25**, 687-698.
- Wisniewski, J.-P., and Rogowsky, P.M.** (2004). Vacuolar H<sup>+</sup>-translocating inorganic pyrophosphatase (Vpp1) marks partial aleurone cell fate in cereal endosperm development. *Plant molecular biology* **56**, 325-337.
- Woo, Y.M., Hu, D.W.N., Larkins, B.A., and Jung, R.** (2001). Genomics analysis of genes expressed in maize endosperm identifies novel seed proteins and clarifies patterns of zein gene expression. *The Plant cell* **13**, 2297-2317.
- Xin, M., Yang, R., Li, G., Chen, H., Laurie, J., Ma, C., Wang, D., Yao, Y., Larkins, B.A., and Sun, Q.** (2013). Dynamic expression of imprinted genes associates with maternally controlled nutrient allocation during maize endosperm development. *The Plant cell* **25**, 3212-3227.
